# Supplementary material for: Stability Constant and Potentiometric Sensitivity of Heavy Metal–Organic Fluorescent Compound Complexes: QSPR Models for Prediction and Design of Novel Coumarin-like Ligands
Source: MDPI journal article supplement (doi:10.3390/toxics11070595), 2023-07-07
Supplement: s1 [file s1]

# Stability Constant and Potentiometric Sensitivity of Heavy Metal – Organic Fluorescent Compound Complexes: QSPR Models for Prediction and Design of Novel Coumarin–Like Ligands

Phan Thi Diem-Tran <sup>1,†</sup>, Tue-Tam Ho <sup>2,†</sup>, Nguyen-Van Tuan <sup>2</sup>, Le-Quang Bao <sup>2</sup>, Ha Tran Phuong <sup>1</sup>, Trinh Thi Giao Chau <sup>1</sup>, Hoang Thi Binh Minh <sup>1</sup>, Cong-Truong Nguyen <sup>2</sup>, Zulayho Smanova <sup>3</sup>, Gerardo M. Casanola-Martin <sup>4</sup>, Bakhtiyor Rasulev <sup>3,4,\*</sup>, Hai Pham-The <sup>2,\*</sup> and Le Canh Viet Cuong <sup>1,\*</sup>

<sup>1</sup> MienTrung Institute for Scientific Research, Vietnam National Museum of Nature, Vietnam Academy of Science and Technology, Hue 53000, Vietnam

<sup>2</sup> Faculty of Pharmaceutical Chemistry and Technology, Hanoi University of Pharmacy, 13-15 Le Thanh Tong, Hoan Kiem, Hanoi 10000, Vietnam

<sup>3</sup> Department of Chemistry, National University of Uzbekistan after Mirzo Ulugbek, Tashkent 100012, Uzbekistan

<sup>4</sup> Department of Coatings and Polymeric Materials, North Dakota State University, Fargo, ND 58102, USA

\* Correspondence: bakhtiyor.rasulev@nds.edu (B.R.); hpham.phd@gmail.com (H.P.-T.); lcvcuong@vnmn.vast.vn (L.C.V.C.)

† These authors contributed equally to this work.

## Supplementary materials:

**Table S1.** Database of experimental potentiometric sensitivity (PS) of complexes between Cu<sup>2+</sup>, Cd<sup>2+</sup>, Pb<sup>2+</sup> ions and compounds

| No. | SMILES                                                                                    | Code  | PS <sub>ML</sub> (mV/dec) |                  |                  |
|-----|-------------------------------------------------------------------------------------------|-------|---------------------------|------------------|------------------|
|     |                                                                                           |       | Cu <sup>2+</sup>          | Cd <sup>2+</sup> | Pb <sup>2+</sup> |
| 1   | <chem>O=C(COCC(N(CCCCCCCC)CCCCCCC)=O)N(CCCCCCCC)CCCCCCC</chem>                            | SEN01 | 5                         | 9                | 30               |
| 2   | <chem>O=C(C(C)OCC(N(CCCCCCCC)CCCCCCC)=O)N(CCCCCCCC)CCCCCCC</chem>                         | SEN02 | 12                        | 13               | 24               |
| 3   | <chem>O=C(C(C)OC(C)C(N(CCCCCCCC)CCCCCCC)=O)N(CCCCCCCC)CCCCC</chem><br>CC                  | SEN03 | 9                         | 13               | 18               |
| 4   | <chem>O=C(N(CC)CC)C1=CC=CC(C(N(CC)CC)=O)=N1</chem>                                        | SEN04 | 25                        | 14               | 27               |
| 5   | <chem>O=C(N1CCCCC1)C2=CC=CC(C(N3CCCCC3)=O)=N2</chem>                                      | SEN05 | 23                        | 14               | 26               |
| 6   | <chem>O=C(N(CC(C)C)CC(C)C)C1=CC=CC(C(N(CC(C)C)CC(C)C)=O)=N1</chem>                        | SEN06 | 34                        | 27               | 51               |
| 7   | <chem>O=C(N(C)C1CCCCC1)C2=NC(C(N(C)C3CCCCC3)=O)=CC=C2</chem>                              | SEN07 | 31                        | 21               | 37               |
| 8   | <chem>O=C(N(CCC1)C2=C1C=CC=C2)C3=NC(C(N(CCC4)C5=C4C=CC=C5)=O)=CC=C3</chem>                | SEN08 | 34                        | 26               | 34               |
| 9   | <chem>O=C(N(CC)C1=C(C)C=CC=C1)C2=NC(C(N(CC)C3=CC=CC=C3)=O)=CC=C2</chem>                   | SEN09 | 43                        | 32               | 44               |
| 10  | <chem>O=C(N(CC)C1=CC=C(C)C=C1)C2=NC(C(N(CC)C3=CC=C(C)C=C3)=O)=CC=C2</chem>                | SEN10 | 43                        | 32               | 45               |
| 11  | <chem>O=C(N(CC)C1=CC=C(F)C=C1)C2=NC(C(N(CC)C3=CC=C(F)C=C3)=O)=CC=C2</chem>                | SEN11 | 37                        | 37               | 37               |
| 12  | <chem>O=C(NCCOC1=CC=CC=C1)C2=NC(C(NCCOC3=CC=CC=C3)=O)=CC=C2</chem>                        | SEN12 | 28                        | 23               | 28               |
| 13  | <chem>O=C(NCCSCC)C1=NC(C(NCCSCC)=O)=CC=C1</chem>                                          | SEN13 | 27                        | 22               | 28               |
| 14  | <chem>O=C(NCCOCCCCCCCC)C1=NC(C(NCCOCCCCCCCC)=O)=CC=C1</chem>                              | SEN14 | 31                        | 24               | 31               |
| 15  | <chem>O=C(NCCOC1=CC=CC=C1OC)C2=NC(C(NCCOC3=C(OC)C=CC=C3)=O)=CC=C2</chem>                  | SEN15 | 28                        | 25               | 29               |
| 16  | <chem>O=C(N(COC)CCOC1=CC=CC=C1)C2=NC(C(N(COC)CCOC3=CC=CC=C3)=O)=CC=C2</chem>              | SEN16 | 25                        | 22               | 42               |
| 17  | <chem>O=C(N(C1=CC=CC=C1)CC)C2=CC=CC(C3=NC(C(N(C4=CC=CC=C4)CC)=O)=CC=C3)=N2</chem>         | SEN17 | 31                        | 36               | 24               |
| 18  | <chem>O=C(N(CCCC)CCCC)C1=CC=CC(C2=NC(C(N(CCCC)CCCC)=O)=CC=C2)=N1</chem>                   | SEN18 | 39                        | 37               | 26               |
| 19  | <chem>O=C(N(C1=CC=CC=C1)CC)C2=CC(Br)=CC(C3=NC(C(N(C4=CC=CC=C4)CC)=O)=CC(Br)=C3)=N2</chem> | SEN19 | 26                        | 36               | 28               |

|    |                                                                                                                   |       |      |      |      |
|----|-------------------------------------------------------------------------------------------------------------------|-------|------|------|------|
| 20 | <chem>O=C(N(C1=CC=C(F)C=C1)CC)C2=CC=CC(C3=NC(C(N(C4=CC=C(F)C=C4)CC)=O)=CC=C3)=N2</chem>                           | SEN20 | 30   | 31   | 23   |
| 21 | <chem>O=C(N(C1=CC=C(CCCCCC)C=C1)CC)C2=CC=CC(C3=NC(C(N(C4=CC=C(CCCC)C=C4)CC)=O)=CC=C3)=N2</chem>                   | SEN21 | 34   | 36   | 23   |
| 22 | <chem>O=C(N(C1=CC=C(CCCCCC)C=C1)CC)C2=CC(Br)=CC(C3=NC(C(N(C4=CC=C(CCCCCC)C=C4)CC)=O)=CC(Br)=C3)=N2</chem>         | SEN22 | 31   | 41   | 27   |
| 23 | <chem>O=C(N(C1=CC=CC=C1)CC)C2=CC=CC(C3=NC=CC=C3)=N2</chem>                                                        | SEN23 | -    | 3    | 0    |
| 24 | <chem>O=C(O)C1=CC=CC(C2=NC=CC=C2)=N1</chem>                                                                       | SEN24 | 1    | 6    | 0    |
| 25 | <chem>N#CC1=CC=CC(C2=NC=CC=C2)=N1</chem>                                                                          | SEN25 | -10  | 5    | 3    |
| 26 | <chem>O=C1NNC(N1/N=C/C2=C(OCCOC3=CC=CC=C3/C=N/N4C(NNC4=O)=O)C=C C=C2)=O</chem>                                    | SEN26 | 15   | 16   | 24   |
| 27 | <chem>O=C1NNC(N1/N=C/C2=C(OCCOCCOC3=CC=CC=C3/C=N/N4C(NNC4=O)=O )C=CC=C2)=O</chem>                                 | SEN27 | 15   | 15   | 24   |
| 28 | <chem>SC1=NN=C(CC)N1/N=C/C2=C(OCCOC3=CC=CC=C3/C=N/N4C(CC)=NN=C4S )C=CC=C2</chem>                                  | SEN28 | 19   | 17   | 25   |
| 29 | <chem>SC1=NN=C(CC)N1/N=C/C2=C(OCCOCCOC3=CC=CC=C3/C=N/N4C(CC)=NN =C4S)C=CC=C2</chem>                               | SEN29 | 34   | 24   | 24   |
| 30 | <chem>NC1=NN=CN1/N=C/C2=C(OCCOC3=CC=CC=C3/C=N/N4C(N)=NN=C4)C=CC =C2</chem>                                        | SEN30 | 28   | 18   | 27   |
| 31 | <chem>NC1=NN=CN1/N=C/C2=C(OCCOCCOC3=CC=CC=C3/C=N/N4C=NN=C4N)C =CC=C2</chem>                                       | SEN31 | 20   | 18   | 28   |
| 32 | <chem>O=C(N(CCCC)CCCC)C1=NC2=C3C(C=CC(C(N(CCCC)CCCC)=O)=N3)=CC=C 2C=C1</chem>                                     | SEN32 | 24   | 26   | 31   |
| 33 | <chem>O=C(N(C1=CC=C(F)C=C1)CC)C2=NC3=C4C(C=CC(C(N(CC)C5=CC=C(F)C=C5 )=O)=N4)=CC=C3C=C2</chem>                     | SEN33 | 23   | 27   | 26   |
| 34 | <chem>O=C(N/N=C/C1=NC=CC=C1)C2=NC(C(N/N=C\ C3=NC=CC=C3)=O)=CC=C2</chem>                                           | SEN34 | 0    | 7    | 0    |
| 35 | <chem>O=C(N/N=C/C1=C(O)C=CC=C1)C2=NC(C(N/N=C\ C3=C(O)C=CC=C3)=O)=CC =C2</chem>                                    | SEN35 | 0    | 5    | 4    |
| 36 | <chem>O=P(CCCCCCCC)(CCCCCCCC)CCCCCCCC</chem>                                                                      | SEN36 | 9    | 18   | 9    |
| 37 | <chem>O=P(C1=CC=CC=C1)(C2=CC=CC=C2)C3=CC=CC=C3</chem>                                                             | SEN37 | 5    | -10  | -20  |
| 38 | <chem>O=P(C1=CC=CC=C1)(C2=CC=CC=C2)CP(C3=CC=CC=C3)(C4=CC=CC=C4)=O</chem>                                          | SEN38 | 26   | 23   | 38   |
| 39 | <chem>O=P(C1=CC=CC=C1)(C2=CC=CC=C2)COCCOCCOCP(C3=CC=CC=C3)(C4=CC =CC=C4)=O</chem>                                 | SEN39 | 30   | 25   | 33   |
| 40 | <chem>O=P(C1=CC=CC=C1)(C2=CC=CC=C2)COCCOCCOCCOCCOCCOCP(C3=CC= CC=C3)(C4=CC=CC=C4)=O</chem>                        | SEN40 | -    | 27   | 40   |
| 41 | <chem>CP(C1=C(OP(C2=CC=CC=C2)(C3=CC=CC=C3)=O)C=CC=C1)(C4=CC=CC=C4 OCP(C5=CC=CC=C5)(C6=CC=CC=C6)=O)=O</chem>       | SEN41 | 20   | 24   | 16   |
| 42 | <chem>CCCN(CCN(CCC)CC(CP(C1=CC=CC=C1)(C2=CC=CC=C2)=O)=O)CC(CP(C3= CC=CC=C3)(C4=CC=CC=C4)=O)=O</chem>              | SEN42 | 20.3 | 24.6 | 32.9 |
| 43 | <chem>O=C(CP(C1=CC=CC=C1)(C2=CC=CC=C2)=O)CN(CCCCCCCC)CCCCN(CCCC CCCC)CC(CP(C3=CC=CC=C3)(C4=CC=CC=C4)=O)=O</chem>  | SEN43 | 18.3 | 22.1 | 31.7 |
| 44 | <chem>O=C(CP(C1=CC=CC=C1)(C2=CC=CC=C2)=O)CN(CCCCCCCC)CCCCCN(CCC CCCCC)CC(CP(C3=CC=CC=C3)(C4=CC=CC=C4)=O)=O</chem> | SEN44 | 21.1 | 24.7 | 34.6 |
| 45 | <chem>O=C(CP(C1=CC=CC=C1)(C2=CC=CC=C2)=O)N3CCN(C(CP(C4=CC=CC=C4)(C 5=CC=CC=C5)=O)=O)CC3</chem>                    | SEN45 | 23.4 | 23   | 34.9 |

**Table S2.** Experimental stability constant (logβ) of complex between Cu<sup>2+</sup> and compounds

| No. | SMILES                                                       | Code | Logβ  |
|-----|--------------------------------------------------------------|------|-------|
| 1   | <chem>CC(/C(C)=N/O)=N\NC(N(C1=CC=CC=C1)[H])=S</chem>         | L1   | 6.468 |
| 2   | <chem>CC(/C=N/NC1=CC=CC=C1)=N\NC(N(C)[H])=S</chem>           | L2   | 12.14 |
| 3   | <chem>S=C(N(C)C)N/N=C(/C(C1=CC=CC=C1)=N/O)C2=CC=CC=C2</chem> | L3   | 5.748 |
| 4   | <chem>NC(N/N=C1C(N(C)C2=C\1C=CC=C2)=O)=S</chem>              | L4   | 9.06  |
| 5   | <chem>NC(N/N=C1CC=C(N)C=C\1)=S</chem>                        | L5   | 11.61 |
| 6   | <chem>NC(N/N=C/C1=C(C=CC=C2)C2=CC=C1O)=S</chem>              | L6   | 9.34  |

|    |                                                                                                                                                                                       |     |       |
|----|---------------------------------------------------------------------------------------------------------------------------------------------------------------------------------------|-----|-------|
| 7  | NC(N/N=C/C1=NC=CC=C1)=S                                                                                                                                                               | L7  | 20.4  |
| 8  | NC(N/N=C/C1=CC=C(N(C)C)C=C1)=S                                                                                                                                                        | L8  | 15.3  |
| 9  | NC(N/N=C/C1=C(O)C=CC=C1)=S                                                                                                                                                            | L10 | 19.1  |
| 10 | NC(N/N=C/C1=CC=C(O)C=C1)=S                                                                                                                                                            | L11 | 17.2  |
| 11 | NC(N/N=C/C1=CC=CC=C1)=S                                                                                                                                                               | L12 | 17.7  |
| 12 | NC(N/N=C/C1=NC(C)=CC=C1)=S                                                                                                                                                            | L13 | 19.1  |
| 13 | NC(N/N=C(C)/C1=CC=CC=N1)=S                                                                                                                                                            | L14 | 5.491 |
| 14 | NC(N/N=C(C)/C1=CC=CN=C1)=S                                                                                                                                                            | L15 | 5.924 |
| 15 | NC(N/N=C/C1=NC(C(O)=CC=C2)=C2C=C1)=S                                                                                                                                                  | L16 | 14.56 |
| 16 | S=C(NCC)N/N=C/C1=NC(C(O)=CC=C2)=C2C=C1                                                                                                                                                | L17 | 14.67 |
| 17 | S=C(NC1=CC=CC=C1)N/N=C/C2=NC(C(O)=CC=C3)=C3C=C2                                                                                                                                       | L18 | 15.65 |
| 18 | NC(N/N=C/C1=CC(OC)=CC(OC)=C1O)=S                                                                                                                                                      | L19 | 6.236 |
| 19 | NC(N/N=C(C)/C1=CC=CC=C1O)=S                                                                                                                                                           | L21 | 5.91  |
| 20 | S=C(NC)N/N=C(C)/C1=CC=CC=N1                                                                                                                                                           | L22 | 6.114 |
| 21 | S=C(N)N/N=C/C1=CC(C)=CC(CN2CCCC2C(O)=O)=C1O                                                                                                                                           | L23 | 17.54 |
| 22 | S=C(N)N/N=C/C1=CC=CC(OC)=C1O                                                                                                                                                          | L24 | 9.44  |
| 23 | S=C(N(C)C)N/N=C(C1=NC=CC=C1)/C2=CC=CC=N2                                                                                                                                              | L26 | 7.08  |
| 24 | CC(/C=N/NC1=CC=CC=C1)=N\NC(N)=S                                                                                                                                                       | L27 | 11.95 |
| 25 | O[C@@H]1CCCC[C@H]1NCCCN[C@H]2[C@H](O)CCCC2                                                                                                                                            | L28 | 11.47 |
| 26 | O[C@@H]1CCCC[C@H]1NCCCN[C@H]2[C@H](O)CCCC2                                                                                                                                            | L29 | 12.67 |
| 27 | O[C@@H]1CCCC[C@H]1NCCNCCN[C@H]2[C@H](O)CCCC2                                                                                                                                          | L30 | 16.74 |
| 28 | OC(CN(CC(O)=O)CCN(CP(O)(O)=O)CCN(CC(O)=O)CC(O)=O)=O                                                                                                                                   | L31 | 21.43 |
| 29 | OC(CN(CC(O)=O)CCN(CP(O)(C1=CC=CC=C1)=O)CCN(CC(O)=O)CC(O)=O)=O                                                                                                                         | L32 | 19.47 |
| 30 | CC(OP(O)(O)=O)=O                                                                                                                                                                      | L33 | 2.86  |
| 31 | CC(CP(O)(O)=O)=O                                                                                                                                                                      | L34 | 3.36  |
| 32 | OP(CCOCC)(O)=O                                                                                                                                                                        | L35 | 3.44  |
| 33 | OP(CCOCCN1C(N=CN=C2N)=C2N=C1)(O)=O                                                                                                                                                    | L36 | 3.98  |
| 34 | CC1=NC(C2=NC(C3=NC=CC=C3)=CC=C2)=CC(C4=CC=CC(C5=CC=CC=N5)=N4)=N1                                                                                                                      | L37 | 12.6  |
| 35 | NC1=NC=NC(C2=NC(C3=NC(C4=CC=CC=C4)=NC(C5=NC(C6=NC=NC(N)=C6)=CC=C5)=C3)=CC=C2)=C1                                                                                                      | L38 | 14.4  |
| 36 | CC(C1C2)(C)C2C(C1=C3)=NC=C3C4=CC=CC(C5=NC=C(C6=NC(C7=NC=C(C8C(C)(C)C9C8)C9=C7)=CC=C6)N=C5)=N4                                                                                         | L39 | 10    |
| 37 | O=C(C1=CC=CC=C1)C2=NC=CC=C2                                                                                                                                                           | L40 | 4.287 |
| 38 | CCN(CC)C1=CC=C2C(OC(C(C(NCC3=NC=CC=C3)=O)=C2)=O)=C1                                                                                                                                   | L41 | 5.068 |
| 39 | NCC(NC(CC1=CNC=N1)C(O)=O)=O                                                                                                                                                           | L42 | 8.68  |
| 40 | NCC(NC(CC1=CNC=N1)C(NC([H])C(O)=O)=O)=O                                                                                                                                               | L43 | 8.52  |
| 41 | NC(CC1=CNC=N1)C(NCC(O)=O)=O                                                                                                                                                           | L44 | 8.02  |
| 42 | N1(CC2=NC=CS2)CCN(CC3=CC=NS3)CCNCCC1                                                                                                                                                  | L45 | 20.77 |
| 43 | N1(CC2=NC=CS2)CCNCCCNCNCCC1                                                                                                                                                           | L46 | 21.56 |
| 44 | N1(CC2=NC=CS2)CCNCCCN(CC3=NC=CS3)CCNCCC1                                                                                                                                              | L47 | 19.9  |
| 45 | NC(CO)(CO)CO                                                                                                                                                                          | L48 | 4.37  |
| 46 | FC1=C(O)C=C(OC(C2=C3C4=CC=C(N(CC(O)=O)CC(O)=O)C(OC)=C4)=CC(C(F)=C2)=O)C3=C1                                                                                                           | L50 | 6.009 |
| 47 | O=C(CN(CC1C(OCOC)C(OCC2=CC=CC=C2)C(OCOC)C3O1)CCC4OC(CN(CC(NC5=CC=C6C7=C5C=CC8=C7C(CC=C8)=CC6)=O)CC3)C(OCOC)C(OCC9=CC=CC=C9)C4OCOC)NC(C=C%10)=C%11C=CC%12=CC=CC%13=CC=C%10C%11=C%12%13 | L51 | 6.7   |
| 48 | O=C(CN(CC1C(OC)C(OCC2=CC=CC=C2)C(OC)C3O1)CCC4OC(CN(CC(NC5=CC=C6C7=C5C=CC8=C7C(CC=C8)=CC6)=O)CC3)C(OC)C(OCC9=CC=CC=C9)C4OC)NC(C=C%10)=C%11C=CC%12=CC=CC%13=CC=C%10C%11=C%12%13         | L52 | 7.8   |
| 49 | NCC(O)=O                                                                                                                                                                              | L53 | 8.15  |
| 50 | O=C(O)CNCC(O)=O                                                                                                                                                                       | L54 | 10.57 |
| 51 | O=C(O)CN(CC(O)=O)CC(O)=O                                                                                                                                                              | L55 | 12.94 |
| 52 | NCCNCC(O)=O                                                                                                                                                                           | L56 | 13.47 |
| 53 | O=C(O)CN(CC(O)=O)CCN(CC(O)=O)CC(O)=O                                                                                                                                                  | L57 | 18.7  |
| 54 | NCCN                                                                                                                                                                                  | L58 | 10.54 |

|    |                                                   |     |       |
|----|---------------------------------------------------|-----|-------|
| 55 | NCCNCCNCCNCCN                                     | L59 | 22.9  |
| 56 | NC(CC(O)=O)C(O)=O                                 | L60 | 9.08  |
| 57 | NC(CC1=CC=CC=C1)C(O)=O                            | L61 | 7.53  |
| 58 | NC(CC1=CNC2=C1C=CC=C2)C(O)=O                      | L62 | 8.47  |
| 59 | NC(CCC(O)=O)C(O)=O                                | L63 | 8.28  |
| 60 | NC(CC(N)=O)C(O)=O                                 | L64 | 8.61  |
| 61 | NC(CC(C)C)C(O)=O                                  | L65 | 7.79  |
| 62 | O=C(O)C1=CC=CC=C1                                 | L66 | 8.4   |
| 63 | O=C(O)COCCN(CC1)CCN1C(C2=CC=CC=C2)C3=CC=CC=C3     | L67 | 9.12  |
| 64 | CC(C)(C)C1=CC=C(C(NN(C)C)=O)C=C1                  | L68 | 4.17  |
| 65 | CC(C)(C)C1=CC=C(C(NN(CCCC)CCCC)=O)C=C1            | L69 | 3.6   |
| 66 | C1=CN=CN1                                         | L70 | 4.18  |
| 67 | O=C(N)CCNCCNCCC(N)=O                              | L71 | 11.73 |
| 68 | OC1=CC=CC=C1/C=N/C2=CC3=C(C(C)=CC(O3)=O)C=C2      | L72 | 7.7   |
| 69 | OC1=C(OC)C=CC=C1/C=N/C2=CC3=C(C(C)=CC(O3)=O)C=C2  | L74 | 6.28  |
| 70 | OC1=C(OCC)C=CC=C1/C=N/C2=CC3=C(C(C)=CC(O3)=O)C=C2 | L75 | 6.3   |
| 71 | OC1=CC(OC)=CC=C1/C=N/C2=CC3=C(C(C)=CC(O3)=O)C=C2  | L76 | 8.29  |

**Table S3.** Experimental stability constant ( $\log\beta$ ) of complex between  $\text{Cd}^{2+}$  and compounds

| No. | SMILES                                                        | Code | Log $\beta$ |
|-----|---------------------------------------------------------------|------|-------------|
| 1   | C1OCCNCCSCCNC1                                                | L77  | 8.1         |
| 2   | C1SCCOCCSCCNC1                                                | L78  | 7.9         |
| 3   | C1SCCSCCSCCNC1                                                | L79  | 5.8         |
| 4   | NCCCN1CCSCCOCCSCC1                                            | L80  | 8.08        |
| 5   | NCCCN1CCSCCSCCSCC1                                            | L81  | 8.2         |
| 6   | NCCCN1CCOCCN(CCCN)CCSCC1                                      | L82  | 9.0         |
| 7   | C1(CNCCNCCNC2)=NC(C(N=C2C=C3)=C3C=C4)=C4C=C1                  | L83  | 17.2        |
| 8   | NCCN1CCNCC(C=C2)=NC3=C2C=CC4=C3N=C(CNCC1)C=C4                 | L84  | 18.83       |
| 9   | C1(CSCCNCCSC2)=NC2=CC=C1                                      | L85  | 9.12        |
| 10  | NCCCN1CCSCC2=CC=CC(CSCC1)=N2                                  | L86  | 10.3        |
| 11  | C1CNCCNCCNCCS1                                                | L87  | 9.91        |
| 12  | C1(CN2C=C(C3=CC=CC=N3)C=N2)=CC=C(CN4N=C(C5=NC=CC=C5)C=C4)C=C1 | L88  | 7.914       |
| 13  | C1(CN2C=C(C3=CC=CC=N3)C=N2)=CC=CC(CN4C=CC(C5=CC=CC=N5)=N4)=C1 | L89  | 7.064       |
| 14  | C1(C2=NC=CC=C2)=NC=CC=C1                                      | L90  | 4.5         |
| 15  | BrC1=CC=C(/N=C/C2=C(O)C(O)=C(O)C=C2)C=C1                      | L91  | 6.67        |
| 16  | OC1=C(C(C)(C)C)C=C(/N=C/C2=C(O)C(O)=C(O)C=C2)C=C1C(C)(C)C     | L92  | 7.03        |
| 17  | CC1=CC=C(/N=C/C2=C(O)C(O)=CC=C2)C=C1                          | L93  | 7.12        |
| 18  | BrC1=CC=C(/N=C/C2=C(O)C(O)=CC=C2)C=C1                         | L94  | 7.09        |
| 19  | OC1=C(C(C)(C)C)C=C(/N=C/C2=C(O)C=C(O)C=C2)C=C1C(C)(C)C        | L95  | 6.86        |
| 20  | NCC(O)=O                                                      | L53  | 4.26        |
| 21  | NC(C(C)C)C(O)=O                                               | L96  | 3.7         |
| 22  | NC(CC(C)C)C(O)=O                                              | L65  | 4.04        |
| 23  | NC(C(CC)C)C(O)=O                                              | L97  | 3.6         |
| 24  | CCCC(N)C(O)=O                                                 | L98  | 3.73        |
| 25  | CCCCC(N)C(O)=O                                                | L99  | 3.86        |
| 26  | NC(CC1=CC=CC=C1)C(O)=O                                        | L61  | 3.6         |
| 27  | NC(CC1=CNC2=C1C=CC=C2)C(O)=O                                  | L62  | 4.51        |
| 28  | NC(CCCNC(N)=N)C(O)=O                                          | L100 | 3.27        |
| 29  | NC(CC(O)=O)C(O)=O                                             | L60  | 4.07        |
| 30  | NC(CCC(N)=O)C(O)=O                                            | L101 | 4.1         |
| 31  | NC(CO)C(O)=O                                                  | L102 | 3.77        |
| 32  | NC([C@@H](C)O)C(O)=O                                          | L103 | 3.9         |
| 33  | NC(CC1=CC=C(O)C=C1)C(O)=O                                     | L104 | 3.56        |
| 34  | NC(CC(O)=O)C(O)=O                                             | L60  | 4.68        |

|    |                                   |      |       |
|----|-----------------------------------|------|-------|
| 35 | <chem>NC(CC1=CNC=N1)C(O)=O</chem> | L42  | 5.58  |
| 36 | <chem>NC(CCSC)C(O)=O</chem>       | L105 | 3.65  |
| 37 | <chem>NC(CS)C(O)=O</chem>         | L106 | 12.82 |
| 38 | <chem>OC(C(S)CC(O)=O)=O</chem>    | L107 | 10.05 |
| 39 | <chem>NCCCC(N)C(O)=O</chem>       | L108 | 3.41  |
| 40 | <chem>NCCCC1=CNC=N1</chem>        | L109 | 4.78  |

**Table S4.** Experimental stability constant ( $\log\beta$ ) of complex between  $\text{Pb}^{2+}$  and compounds

| No. | SMILES                                                                                                                                                                | Code | Log $\beta$ |
|-----|-----------------------------------------------------------------------------------------------------------------------------------------------------------------------|------|-------------|
| 1   | <chem>S=C1NN=C(C2=CC=CC=N2)C(C3=NC=CC=C3)(O)N1</chem>                                                                                                                 | L110 | 5.8         |
| 2   | <chem>CC1(C2=CC=CS2)NC(C=CC=C3)=C3N=C(C4=CC=CS4)C1</chem>                                                                                                             | L111 | 2.44        |
| 3   | <chem>C12=CC=CC=C1C=C(OCCOCCOCCO3)C3=C2</chem>                                                                                                                        | L112 | 2.29        |
| 4   | <chem>NC(N/N=C\ C(CC(O)C(CO)O)=N/NC(N)=S)=S</chem>                                                                                                                    | L113 | 2.74        |
| 5   | <chem>OC1(C2(O)C(O)CCCC2)CCCCC1O</chem>                                                                                                                               | L114 | 4.09        |
| 6   | <chem>O=C(N/N=C\ C1=CC=CO1)C2=CC=CO2</chem>                                                                                                                           | L115 | 2.9         |
| 7   | <chem>CN1C(C)=C(NC(NC2=C(OC)C=CC=C2)=S)C(N1C3=CC=CC=C3)=O</chem>                                                                                                      | L116 | 2.23        |
| 8   | <chem>OC1C(O)(C2CCCC/C2=N/O)CCCC1</chem>                                                                                                                              | L117 | 2.45        |
| 9   | <chem>C/C(C1=CC=CS1)=N\ C2=C(N)C=CC=C2</chem>                                                                                                                         | L118 | 2.44        |
| 10  | <chem>CC1=C(C(N)=O)C=NN1C2=CC=CC=C2</chem>                                                                                                                            | L119 | 2.74        |
| 11  | <chem>NN(C(NN)=NN=C1C)C1=O</chem>                                                                                                                                     | L120 | 2.73        |
| 12  | <chem>C1(/C=N/CCC/N=C/C2=CC=CS2)=CC=CS1</chem>                                                                                                                        | L121 | 3.35        |
| 13  | <chem>NN(C(NN=C1C)=S)C1=S</chem>                                                                                                                                      | L122 | 2.23        |
| 14  | <chem>O=C(NNS(=O)(C1=C(C=CC=C2N(C)C)C2=CC=C1)=O)NC3=CC=CC=C3</chem>                                                                                                   | L123 | 2.1         |
| 15  | <chem>OC(C1=CC=CC=C1)/C(C2=CC=CC=C2)=N/NC(C3=CC=CC=C3)=O</chem>                                                                                                       | L124 | 2.74        |
| 16  | <chem>CC(/C(C)=N/N=C\ C1=CC=CS1)=N\ N=C/C2=CC=CS2</chem>                                                                                                              | L125 | 2.24        |
| 17  | <chem>CC1=C(/N=C\ N(C)/C=N/C2=CC=C(C)C=C2)C=CC(C)=C1</chem>                                                                                                           | L126 | 2.31        |
| 18  | <chem>OC1=C(CC2=C(OC(C3=CC=CC=C3)=O)C(C4=C(OC(C5=CC=CC=C5)=O)C6=CC(C(C)(C)C)=C4)=CC(C(C)(C)C)=C2)C=C(C(C)(C)C)C=C1CC7=CC(C(C)(C)C)=CC(C6)=C7OC(C8=CC=C C=C8)=O</chem> | L127 | 2.86        |
| 19  | <chem>C1(N=C(/N=C\ C2=CC=CS2)S3)=C3C=CC=C1</chem>                                                                                                                     | L128 | 2.2         |
| 20  | <chem>S=C1SC(SCC2=CC=CC(CS3)=N2)=C(SCC4=CC=CC(CSC(S5)=C3SC5=S)=N4)S1</chem>                                                                                           | L129 | 2.1         |
| 21  | <chem>O=C(N/N=C\ C1=NC=CC=C1)C2=CC=CO2</chem>                                                                                                                         | L130 | 2.42        |
| 22  | <chem>CC(/C(C)=N\ N=C\ C1=CC=C([N+])([O-])=O)O1)=N/N=C/C2=CC=C([N+])([O-])=O)O2</chem>                                                                                | L131 | 2.95        |
| 23  | <chem>O=C(NCCNC(C1=NC=CC=C1)=O)C2=CC=CC=N2</chem>                                                                                                                     | L132 | 2.74        |
| 24  | <chem>S=C(N/N=C(C(C1=CC=CC=C1)=O)/C2=CC=CC=C2)NC3=CC=CC=C3</chem>                                                                                                     | L133 | 2.9         |
| 25  | <chem>CC1=C(C)C=C(NC(C2=NC(C=CC=C3)=C3C=C2)=O)C(NC(C4=CC=C(C=CC=C5)C5=N4)=O)=C1</chem>                                                                                | L134 | 3.44        |
| 26  | <chem>NC(N/N=C(C1=CC=CC=C1)/C(C2=CC=CC=C2)=N/NC(N)=S)=S</chem>                                                                                                        | L135 | 4.42        |
| 27  | <chem>N#CCN1CCOCCOCCN(CC#N)CCOCCOCC1</chem>                                                                                                                           | L136 | 6.9         |
| 28  | <chem>O=[N+])([O-])C1=C(C(O)=O)C=C(SSC2=CC=C([N+])([O-])=O)C(C(O)=O)=C2)C=C1</chem>                                                                                   | L137 | 6.22        |
| 29  | <chem>OC(C=CC=C1)=C1/C(C2=CC=CC=C2)=N/CCCN(CCC/N=C(C3=CC=CC=C3O)\ C4=CC=CC=C4)CCC/N=C(C5=CC=CC=C5)/C6=C(O)C=CC=C6</chem>                                              | L138 | 2.86        |
| 30  | <chem>CC1=C(N=C(N/N=C/C2=CC=CS2)S3)C3=CC=C1</chem>                                                                                                                    | L139 | 2.74        |
| 31  | <chem>O=C1C2=CC=CC3=CC=CC(C1=NNC(C4=CC=CO4)=O)=C32</chem>                                                                                                             | L140 | 2.27        |
| 32  | <chem>NC(N/N=C/C1=C(C=CC=C2)C2=CC=C1O)=S</chem>                                                                                                                       | L6   | 7.23        |
| 33  | <chem>NC(N/N=C1C(C=CC=C2)=C2N(C)C\ 1=O)=S</chem>                                                                                                                      | L141 | 8.109       |
| 34  | <chem>NC(N/N=C/C1=CC=CC(OC)=C1O)=S</chem>                                                                                                                             | L142 | 6.83        |
| 35  | <chem>C/C(C1=CC=CC=C1O)=N\ NC(N)=S</chem>                                                                                                                             | L143 | 5.01        |

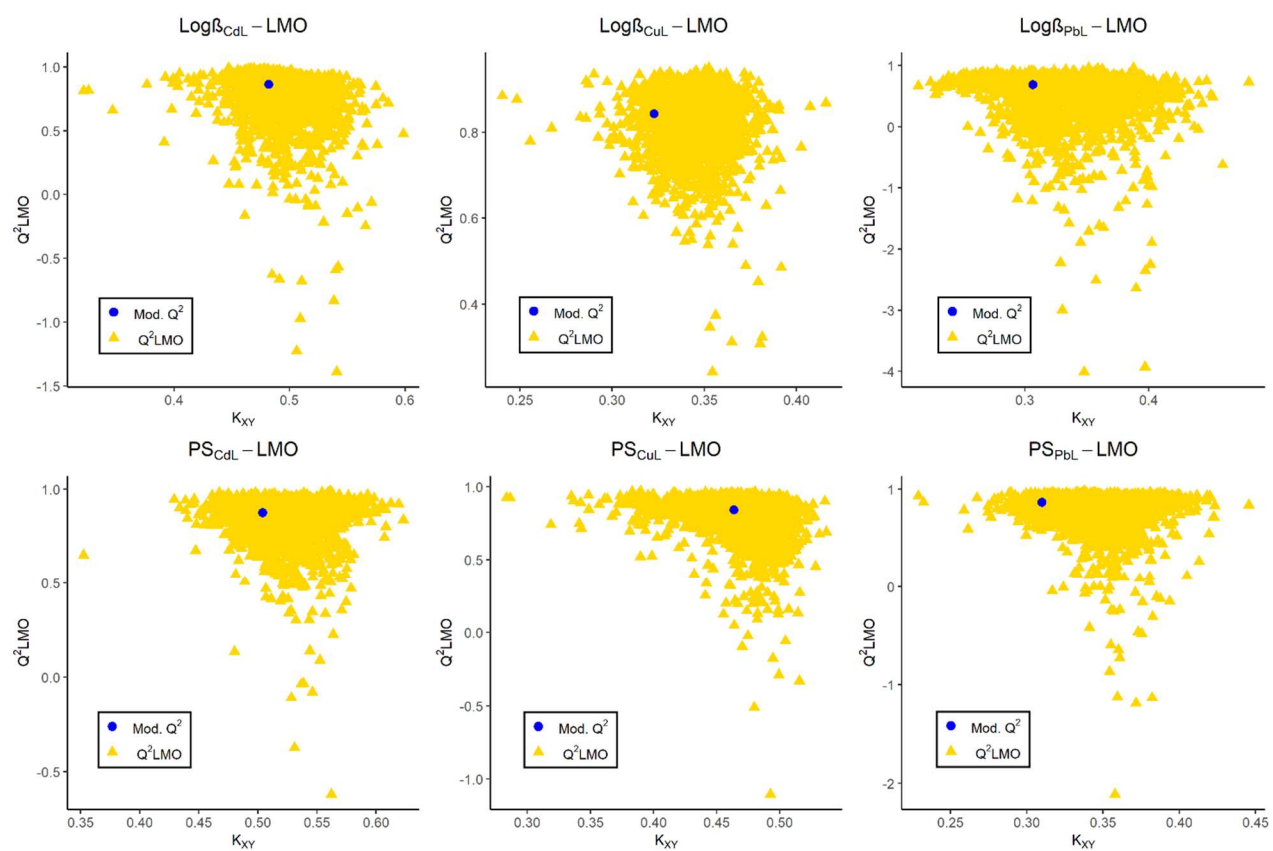

**Figure S1.** Scatter plots of LMO validation approach.

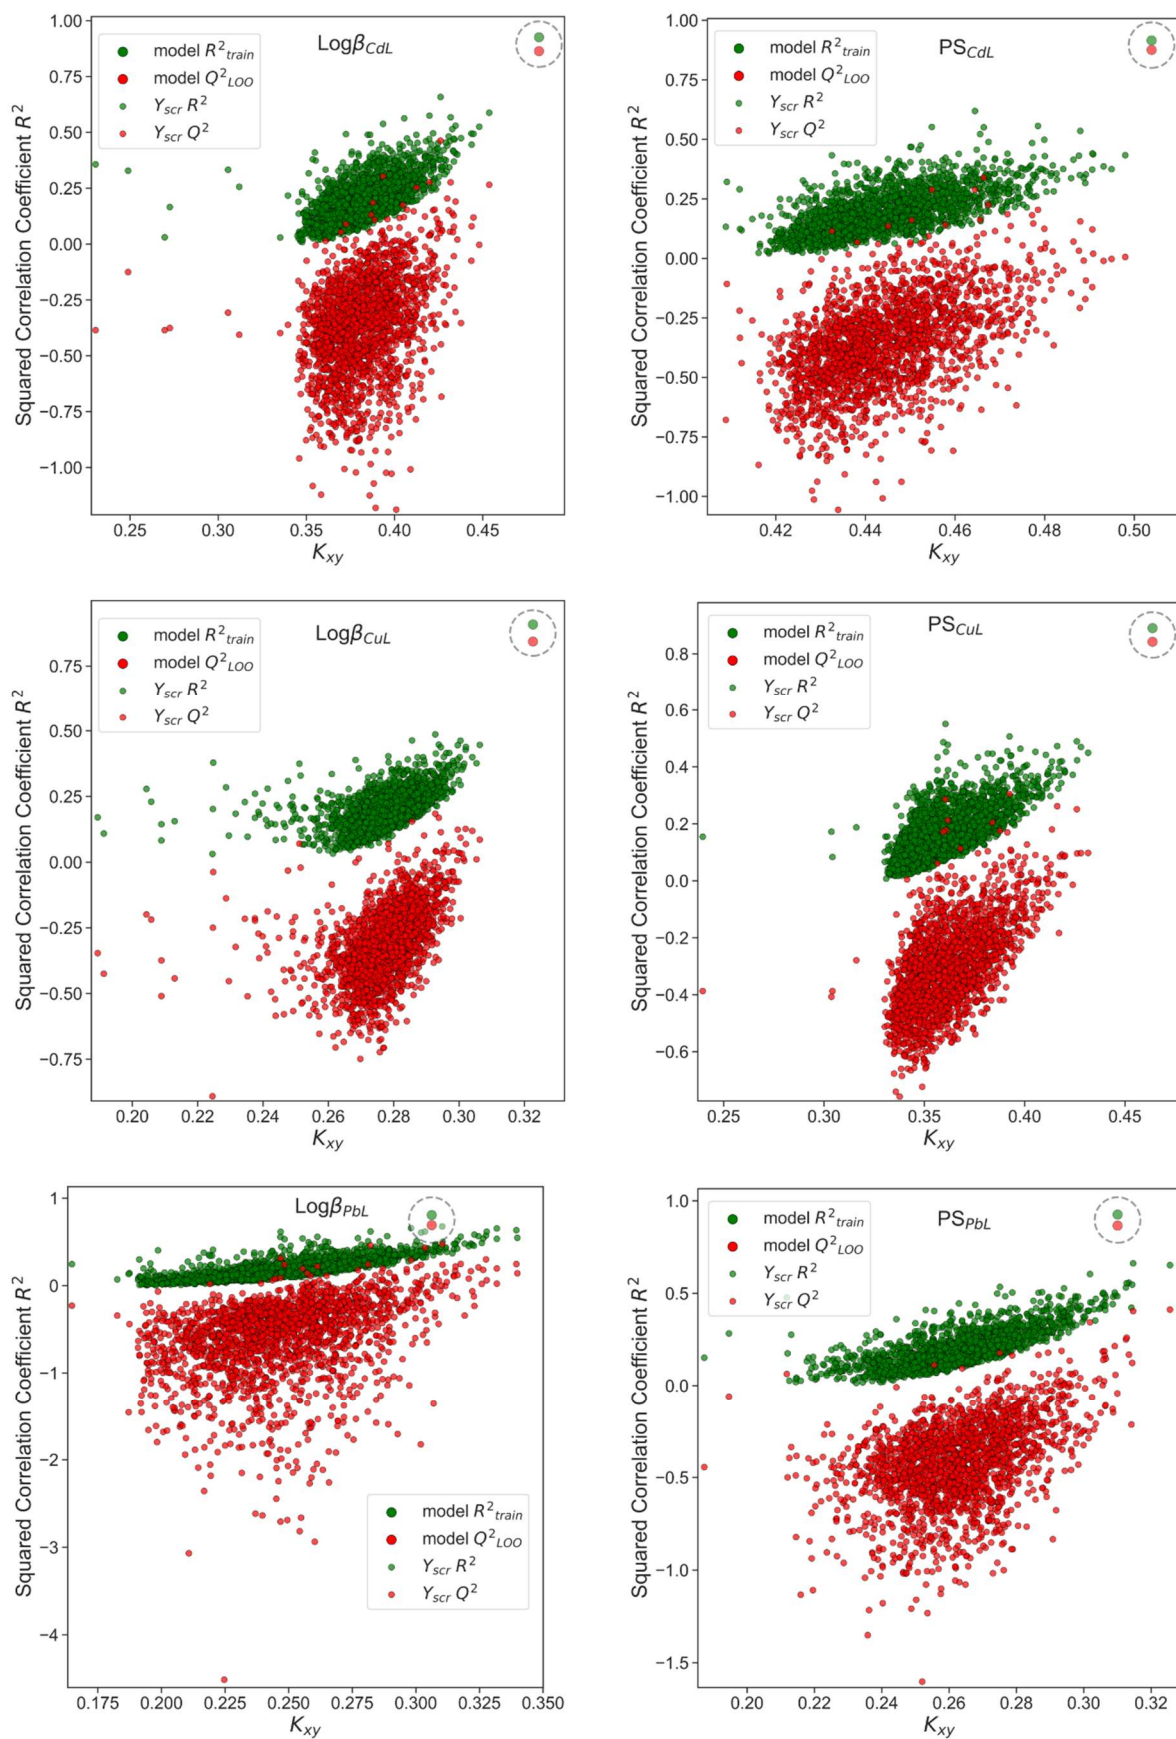

**Figure S2.** Y-Randomization test compared to original QSPR model.

**Table S5.** Runtime parameters optimized for ML algorithm predicting  $\log\beta$  of complex between  $\text{Cd}^{2+}$  and compounds.

| Algorithms                                     | Optimized Parameters                                                                                                                                                                                                                                                                                                                                                                                                                                                                                                                                                          |
|------------------------------------------------|-------------------------------------------------------------------------------------------------------------------------------------------------------------------------------------------------------------------------------------------------------------------------------------------------------------------------------------------------------------------------------------------------------------------------------------------------------------------------------------------------------------------------------------------------------------------------------|
| <i>AdaBoostRegressor_DecisionTreeRegressor</i> | AdaBoostRegressor(base_estimator=DecisionTreeRegressor(ccp_alpha=0.0, criterion='squared_error', max_depth=6, max_features=None, max_leaf_nodes=None, min_impurity_decrease=0.0, min_samples_leaf=1, min_samples_split=2, min_weight_fraction_leaf=0.0, random_state=None, splitter='best'), learning_rate=1.0, loss='linear', n_estimators=50, random_state=None)<br>{'n_estimators': 4, 'loss': 'square', 'learning_rate': 0.01}                                                                                                                                            |
| <i>AdaBoostRegressor_LinearRegression</i>      | AdaBoostRegressor(base_estimator=LinearRegression(copy_X=True, fit_intercept=True, n_jobs=None, normalize='deprecated', positive=False), learning_rate=1.0, loss='linear', n_estimators=50, random_state=None)<br>Fitting 5 folds for each of 100 candidates, totalling 500 fits<br>{'n_estimators': 4, 'loss': 'square', 'learning_rate': 0.01}                                                                                                                                                                                                                              |
| <i>DecisionTreeRegressor</i>                   | best hyperparameters {'splitter': 'random', 'min_weight_fraction_leaf': 0.1, 'min_samples_leaf': 2, 'max_leaf_nodes': 41, 'max_features': None, 'max_depth': 62}                                                                                                                                                                                                                                                                                                                                                                                                              |
| <i>GaussianProcessRegressor</i>                | GaussianProcessRegressor(alpha=1e-10, copy_X_train=True, kernel=None, n_restarts_optimizer=0, normalize_y=False, optimizer='fmin_l_bfgs_b', random_state=None)<br>{'kernel': DotProduct(sigma_0=100), 'alpha': 0.1}                                                                                                                                                                                                                                                                                                                                                           |
| <i>GradientBoostingRegressor</i>               | GradientBoostingRegressor(alpha=0.9, ccp_alpha=0.0, criterion='friedman_mse', init=None, learning_rate=0.1, loss='squared_error', max_depth=3, max_features=None, max_leaf_nodes=None, min_impurity_decrease=0.0, min_samples_leaf=1, min_samples_split=2, min_weight_fraction_leaf=0.0, n_estimators=100, n_iter_no_change=None, random_state=None, subsample=1.0, tol=0.0001, validation_fraction=0.1, verbose=0, warm_start=False)<br>{'n_estimators': 36, 'min_samples_split': 10, 'min_samples_leaf': 1, 'max_features': 'log2', 'max_depth': 7, 'learning_rate': 1}     |
| <i>KNeighborsRegressor</i>                     | KNeighborsRegressor(algorithm='auto', leaf_size=30, metric='minkowski', metric_params=None, n_jobs=None, n_neighbors=5, p=2, weights='uniform')<br>{'weights': 'uniform', 'p': 1, 'n_neighbors': 4, 'metric': 'minkowski', 'leaf_size': 36}                                                                                                                                                                                                                                                                                                                                   |
| <i>MLPRegressor</i>                            | MLPRegressor(activation='relu', alpha=0.0001, batch_size='auto', beta_1=0.9, beta_2=0.999, early_stopping=False, epsilon=1e-08, hidden_layer_sizes=(100,)), learning_rate='constant', learning_rate_init=0.001, max_fun=15000, max_iter=100000, momentum=0.9, n_iter_no_change=10, nesterovs_momentum=True, power_t=0.5, random_state=None, shuffle=True, solver='adam', tol=0.0001, validation_fraction=0.1, verbose=False, warm_start=False)<br>best hyperparameters {'solver': 'lbfgs', 'learning_rate': 'invscaling', 'hidden_layer_sizes': 43, 'activation': 'logistic'} |
| <i>RandomForestRegressor</i>                   | RandomForestRegressor(bootstrap=True, ccp_alpha=0.0, criterion='squared_error', max_depth=None, max_features=1.0, max_leaf_nodes=None, max_samples=None, min_impurity_decrease=0.0,                                                                                                                                                                                                                                                                                                                                                                                           |



|                               |                                                                                                                                                                                                                                                                                                                     |
|-------------------------------|---------------------------------------------------------------------------------------------------------------------------------------------------------------------------------------------------------------------------------------------------------------------------------------------------------------------|
|                               | min_samples_leaf=1, min_samples_split=2,<br>min_weight_fraction_leaf=0.0, n_estimators=100,<br>n_jobs=None, oob_score=False, random_state=None,<br>verbose=0, warm_start=False)<br>{'n_estimators': 4, 'min_samples_split': 2, 'min_samples_leaf': 2, 'max_features':<br>'log2', 'max_depth': 6, 'bootstrap': True} |
| <i>SupportVectorRegressor</i> | SVR(C=1.0, cache_size=200, coef0=0.0, degree=3, epsilon=0.1, gamma='scale',<br>kernel='rbf', max_iter=-1, shrinking=True, tol=0.001, verbose=False)<br>best hyperparameters {'kernel': 'linear', 'gamma': 1e-05, 'epsilon': 0.4, 'C': 0.001}                                                                        |

**Table S6.** Runtime parameters optimized for ML algorithm predicting  $PS_{ML}$  of complex between  $Cd^{2+}$  and compounds.

| <b>Algorithms</b>                | <b>Optimized Parameters</b>                                                                                                                                                                                                                                                                                                                                                                                                                                                                                                                                                 |
|----------------------------------|-----------------------------------------------------------------------------------------------------------------------------------------------------------------------------------------------------------------------------------------------------------------------------------------------------------------------------------------------------------------------------------------------------------------------------------------------------------------------------------------------------------------------------------------------------------------------------|
| <i>AdaBoostRegressor</i>         | AdaBoostRegressor(base_estimator=DecisionTreeRegressor(ccp_alpha=0.0, criterion='squared_error', max_depth=6, max_features=None, max_leaf_nodes=None, min_impurity_decrease=0.0, min_samples_leaf=1, min_samples_split=2, min_weight_fraction_leaf=0.0, random_state=None, splitter='best'), learning_rate=1.0, loss='linear', n_estimators=50, random_state=None)<br>{'n_estimators': 48, 'loss': 'linear', 'learning_rate': 0.5}                                                                                                                                          |
| <i>AdaBoostRegressor_MLR</i>     | AdaBoostRegressor(base_estimator=LinearRegression(copy_X=True, fit_intercept=True, n_jobs=None, normalize='deprecated', positive=False), learning_rate=1.0, loss='linear', n_estimators=50, random_state=None)<br>Fitting 5 folds for each of 100 candidates, totalling 500 fits<br>{'n_estimators': 73, 'loss': 'exponential', 'learning_rate': 0.01}                                                                                                                                                                                                                      |
| <i>DecisionTreeRegressor</i>     | best hyperparameters {'splitter': 'best', 'min_weight_fraction_leaf': 0.3, 'min_samples_leaf': 11, 'max_leaf_nodes': 124, 'max_features': 'log2', 'max_depth': 47}                                                                                                                                                                                                                                                                                                                                                                                                          |
| <i>GaussianProcessRegressor</i>  | GaussianProcessRegressor(alpha=1e-10, copy_X_train=True, kernel=None, n_restarts_optimizer=0, normalize_y=False, optimizer='fmin_l_bfgs_b', random_state=None)<br>{'kernel': DotProduct(sigma_0=10), 'alpha': 0.0001}                                                                                                                                                                                                                                                                                                                                                       |
| <i>GradientBoostingRegressor</i> | GradientBoostingRegressor(alpha=0.9, ccp_alpha=0.0, criterion='friedman_mse', init=None, learning_rate=0.1, loss='squared_error', max_depth=3, max_features=None, max_leaf_nodes=None, min_impurity_decrease=0.0, min_samples_leaf=1, min_samples_split=2, min_weight_fraction_leaf=0.0, n_estimators=100, n_iter_no_change=None, random_state=None, subsample=1.0, tol=0.0001, validation_fraction=0.1, verbose=0, warm_start=False)<br>{'n_estimators': 91, 'min_samples_split': 10, 'min_samples_leaf': 1, 'max_features': 'sqrt', 'max_depth': 6, 'learning_rate': 0.5} |
| <i>KNeighborsRegressor</i>       | KNeighborsRegressor(algorithm='auto', leaf_size=30, metric='minkowski', metric_params=None, n_jobs=None, n_neighbors=5, p=2, weights='uniform')<br>{'weights': 'distance', 'p': 1, 'n_neighbors': 23, 'metric': 'minkowski', 'leaf_size': 37}                                                                                                                                                                                                                                                                                                                               |

|                               |                                                                                                                                                                                                                                                                                                                                                                                                                                                                                                                                                                              |
|-------------------------------|------------------------------------------------------------------------------------------------------------------------------------------------------------------------------------------------------------------------------------------------------------------------------------------------------------------------------------------------------------------------------------------------------------------------------------------------------------------------------------------------------------------------------------------------------------------------------|
| <i>RandomForestRegressor</i>  | MLPRegressor(activation='relu', alpha=0.0001, batch_size='auto', beta_1=0.9, beta_2=0.999, early_stopping=False, epsilon=1e-08, hidden_layer_sizes=(100,), learning_rate='constant', learning_rate_init=0.001, max_fun=15000, max_iter=100000, momentum=0.9, n_iter_no_change=10, nesterovs_momentum=True, power_t=0.5, random_state=None, shuffle=True, solver='adam', tol=0.0001, validation_fraction=0.1, verbose=False, warm_start=False)<br>best hyperparameters {'solver': 'lbfgs', 'learning_rate': 'invscaling', 'hidden_layer_sizes': 14, 'activation': 'identity'} |
| <i>RandomForestRegressor</i>  | RandomForestRegressor(bootstrap=True, ccp_alpha=0.0, criterion='squared_error', max_depth=None, max_features=1.0, max_leaf_nodes=None, max_samples=None, min_impurity_decrease=0.0, min_samples_leaf=1, min_samples_split=2, min_weight_fraction_leaf=0.0, n_estimators=100, n_jobs=None, oob_score=False, random_state=None, verbose=0, warm_start=False)<br>{'n_estimators': 89, 'min_samples_split': 2, 'min_samples_leaf': 1, 'max_features': 'sqrt', 'max_depth': 10, 'bootstrap': False}                                                                               |
| <i>SupportVectorRegressor</i> | SVR(C=1.0, cache_size=200, coef0=0.0, degree=3, epsilon=0.1, gamma='scale', kernel='rbf', max_iter=-1, shrinking=True, tol=0.001, verbose=False)<br>best hyperparameters {'kernel': 'linear', 'gamma': 0.1, 'epsilon': 1, 'C': 100.0}                                                                                                                                                                                                                                                                                                                                        |

**Table S7.** Runtime parameters optimized for ML algorithm predicting  $\log\beta$  of complex between  $\text{Cu}^{2+}$  and compounds.

| <b>Algorithms</b>               | <b>Optimized Parameters</b>                                                                                                                                                                                                                                                                                                                                                                                                     |
|---------------------------------|---------------------------------------------------------------------------------------------------------------------------------------------------------------------------------------------------------------------------------------------------------------------------------------------------------------------------------------------------------------------------------------------------------------------------------|
| <i>AdaBoostRegressor</i>        | AdaBoostRegressor(base_estimator=DecisionTreeRegressor(ccp_alpha=0.0, criterion='squared_error', max_depth=6, max_features=None, max_leaf_nodes=None, min_impurity_decrease=0.0, min_samples_leaf=1, min_samples_split=2, min_weight_fraction_leaf=0.0, random_state=None, splitter='best'), learning_rate=1.0, loss='linear', n_estimators=50, random_state=None)<br>{'n_estimators': 5, 'loss': 'linear', 'learning_rate': 1} |
| <i>AdaBoostRegressor</i>        | AdaBoostRegressor(base_estimator=LinearRegression(copy_X=True, fit_intercept=True, n_jobs=None, normalize='deprecated', positive=False), learning_rate=1.0, loss='linear', n_estimators=50, random_state=None)<br>Fitting 5 folds for each of 100 candidates, totalling 500 fits<br>{'n_estimators': 62, 'loss': 'linear', 'learning_rate': 0.1}                                                                                |
| <i>DecisionTreeRegressor</i>    | best hyperparameters {'splitter': 'random', 'min_weight_fraction_leaf': 0.1, 'min_samples_leaf': 4, 'max_leaf_nodes': 145, 'max_features': None, 'max_depth': 146}                                                                                                                                                                                                                                                              |
| <i>GaussianProcessRegressor</i> | GaussianProcessRegressor(alpha=1e-10, copy_X_train=True, kernel=None, n_restarts_optimizer=0, normalize_y=False, optimizer='fmin_l_bfgs_b', random_state=None)<br>{'kernel': DotProduct(sigma_0=10), 'alpha': 0.001}                                                                                                                                                                                                            |

|                                  |                                                                                                                                                                                                                                                                                                                                                                                                                                                                                                                                                                                |
|----------------------------------|--------------------------------------------------------------------------------------------------------------------------------------------------------------------------------------------------------------------------------------------------------------------------------------------------------------------------------------------------------------------------------------------------------------------------------------------------------------------------------------------------------------------------------------------------------------------------------|
| <i>GradientBoostingRegressor</i> | GradientBoostingRegressor(alpha=0.9, ccp_alpha=0.0, criterion='friedman_mse', init=None, learning_rate=0.1, loss='squared_error', max_depth=3, max_features=None, max_leaf_nodes=None, min_impurity_decrease=0.0, min_samples_leaf=1, min_samples_split=2, min_weight_fraction_leaf=0.0, n_estimators=100, n_iter_no_change=None, random_state=None, subsample=1.0, tol=0.0001, validation_fraction=0.1, verbose=0, warm_start=False)<br>{'n_estimators': 70, 'min_samples_split': 10, 'min_samples_leaf': 1, 'max_features': 'log2', 'max_depth': None, 'learning_rate': 0.5} |
| <i>KNeighborsRegressor</i>       | KNeighborsRegressor(algorithm='auto', leaf_size=30, metric='minkowski', metric_params=None, n_jobs=None, n_neighbors=5, p=2, weights='uniform')<br>{'weights': 'distance', 'p': 2, 'n_neighbors': 2, 'metric': 'euclidean', 'leaf_size': 6}                                                                                                                                                                                                                                                                                                                                    |
| <i>MLPRegressor</i>              | MLPRegressor(activation='relu', alpha=0.0001, batch_size='auto', beta_1=0.9, beta_2=0.999, early_stopping=False, epsilon=1e-08, hidden_layer_sizes=(100,)), learning_rate='constant', learning_rate_init=0.001, max_fun=15000, max_iter=100000, momentum=0.9, n_iter_no_change=10, nesterovs_momentum=True, power_t=0.5, random_state=None, shuffle=True, solver='adam', tol=0.0001, validation_fraction=0.1, verbose=False, warm_start=False)<br>best hyperparameters {'solver': 'lbfgs', 'learning_rate': 'constant', 'hidden_layer_sizes': 84, 'activation': 'identity'}    |
| <i>RandomForestRegressor</i>     | RandomForestRegressor(bootstrap=True, ccp_alpha=0.0, criterion='squared_error', max_depth=None, max_features=1.0, max_leaf_nodes=None, max_samples=None, min_impurity_decrease=0.0, min_samples_leaf=1, min_samples_split=2, min_weight_fraction_leaf=0.0, n_estimators=100, n_jobs=None, oob_score=False, random_state=None, verbose=0, warm_start=False)<br>{'n_estimators': 4, 'min_samples_split': 5, 'min_samples_leaf': 4, 'max_features': 'log2', 'max_depth': 8, 'bootstrap': True}                                                                                    |
| <i>SupportVectorRegressor</i>    | SVR(C=1.0, cache_size=200, coef0=0.0, degree=3, epsilon=0.1, gamma='scale', kernel='rbf', max_iter=-1, shrinking=True, tol=0.001, verbose=False)<br>best hyperparameters {'kernel': 'linear', 'gamma': 0.1, 'epsilon': 1, 'C': 100.0}                                                                                                                                                                                                                                                                                                                                          |

**Table S8.** Runtime parameters optimized for ML algorithm predicting  $PS_{ML}$  of complex between  $Cu^{2+}$  and compounds.

| Algorithms                   | Optimized Parameters                                                                                                                                                                                                                                                                                                                                                                                                              |
|------------------------------|-----------------------------------------------------------------------------------------------------------------------------------------------------------------------------------------------------------------------------------------------------------------------------------------------------------------------------------------------------------------------------------------------------------------------------------|
| <i>AdaBoostRegressor_DTR</i> | AdaBoostRegressor(base_estimator=DecisionTreeRegressor(ccp_alpha=0.0, criterion='squared_error', max_depth=6, max_features=None, max_leaf_nodes=None, min_impurity_decrease=0.0, min_samples_leaf=1, min_samples_split=2, min_weight_fraction_leaf=0.0, random_state=None, splitter='best'), learning_rate=1.0, loss='linear', n_estimators=50, random_state=None)<br>{'n_estimators': 5, 'loss': 'linear', 'learning_rate': 0.5} |
| <i>AdaBoostRegressor_MLR</i> | AdaBoostRegressor(base_estimator=LinearRegression(copy_X=True, fit_intercept=True, n_jobs=None, normalize='deprecated', positive=False),                                                                                                                                                                                                                                                                                          |

|                                  |                                                                                                                                                                                                                                                                                                                                                                                                                                                                                                                                                                                                                                                                                                 |
|----------------------------------|-------------------------------------------------------------------------------------------------------------------------------------------------------------------------------------------------------------------------------------------------------------------------------------------------------------------------------------------------------------------------------------------------------------------------------------------------------------------------------------------------------------------------------------------------------------------------------------------------------------------------------------------------------------------------------------------------|
|                                  | learning_rate=1.0, loss='linear', n_estimators=50,<br>random_state=None)<br>Fitting 5 folds for each of 100 candidates, totalling 500 fits<br>{'n_estimators': 78, 'loss': 'linear', 'learning_rate': 1}                                                                                                                                                                                                                                                                                                                                                                                                                                                                                        |
| <i>DecisionTreeRegressor</i>     | best hyperparameters {'splitter': 'random', 'min_weight_fraction_leaf': 0.1,<br>'min_samples_leaf': 2, 'max_leaf_nodes': 13, 'max_features': 'log2', 'max_depth': 4}                                                                                                                                                                                                                                                                                                                                                                                                                                                                                                                            |
| <i>GaussianProcessRegressor</i>  | GaussianProcessRegressor(alpha=1e-10, copy_X_train=True, kernel=None,<br>n_restarts_optimizer=0, normalize_y=False,<br>optimizer='fmin_l_bfgs_b', random_state=None)<br>{'kernel': DotProduct(sigma_0=0.1), 'alpha': 0.0001}                                                                                                                                                                                                                                                                                                                                                                                                                                                                    |
| <i>GradientBoostingRegressor</i> | GradientBoostingRegressor(alpha=0.9, ccp_alpha=0.0, criterion='friedman_mse',<br>init=None, learning_rate=0.1, loss='squared_error',<br>max_depth=3, max_features=None, max_leaf_nodes=None,<br>min_impurity_decrease=0.0, min_samples_leaf=1,<br>min_samples_split=2, min_weight_fraction_leaf=0.0,<br>n_estimators=100, n_iter_no_change=None,<br>random_state=None, subsample=1.0, tol=0.0001,<br>validation_fraction=0.1, verbose=0, warm_start=False)<br>{'n_estimators': 100, 'min_samples_split': 5, 'min_samples_leaf': 2, 'max_features':<br>'sqrt', 'max_depth': 6, 'learning_rate': 0.5}                                                                                             |
| <i>KNeighborsRegressor</i>       | KNeighborsRegressor(algorithm='auto', leaf_size=30, metric='minkowski',<br>metric_params=None, n_jobs=None, n_neighbors=5, p=2,<br>weights='uniform')                                                                                                                                                                                                                                                                                                                                                                                                                                                                                                                                           |
| <i>MLPRegressor</i>              | {'weights': 'uniform', 'p': 1, 'n_neighbors': 12, 'metric': 'manhattan', 'leaf_size': 12}<br>MLPRegressor(activation='relu', alpha=0.0001, batch_size='auto', beta_1=0.9,<br>beta_2=0.999, early_stopping=False, epsilon=1e-08,<br>hidden_layer_sizes=(100,), learning_rate='constant',<br>learning_rate_init=0.001, max_fun=15000, max_iter=100000,<br>momentum=0.9, n_iter_no_change=10, nesterovs_momentum=True,<br>power_t=0.5, random_state=None, shuffle=True, solver='adam',<br>tol=0.0001, validation_fraction=0.1, verbose=False,<br>warm_start=False)<br>best hyperparameters {'solver': 'lbfgs', 'learning_rate': 'constant',<br>'hidden_layer_sizes': 44, 'activation': 'identity'} |
| <i>RandomForestRegressor</i>     | RandomForestRegressor(bootstrap=True, ccp_alpha=0.0, criterion='squared_error',<br>max_depth=None, max_features=1.0, max_leaf_nodes=None,<br>max_samples=None, min_impurity_decrease=0.0,<br>min_samples_leaf=1, min_samples_split=2,<br>min_weight_fraction_leaf=0.0, n_estimators=100,<br>n_jobs=None, oob_score=False, random_state=None,<br>verbose=0, warm_start=False)<br>{'n_estimators': 8, 'min_samples_split': 5, 'min_samples_leaf': 4, 'max_features': 'sqrt',<br>'max_depth': 6, 'bootstrap': False}                                                                                                                                                                               |
| <i>SupportVectorRegressor</i>    | SVR(C=1.0, cache_size=200, coef0=0.0, degree=3, epsilon=0.1, gamma='scale',<br>kernel='rbf', max_iter=-1, shrinking=True, tol=0.001, verbose=False)<br>best hyperparameters {'kernel': 'linear', 'gamma': 10.0, 'epsilon': 0.5, 'C': 100.0}                                                                                                                                                                                                                                                                                                                                                                                                                                                     |

**Table S9.** Runtime parameters optimized for ML algorithm predicting  $\log\beta$  of complex between  $\text{Pb}^{2+}$  and compounds.

| Algorithms                   | Optimized Parameters                                                                                                                                                                            |
|------------------------------|-------------------------------------------------------------------------------------------------------------------------------------------------------------------------------------------------|
| <i>AdaBoostRegressor_DTR</i> | AdaBoostRegressor(base_estimator=DecisionTreeRegressor(ccp_alpha=0.0,<br>criterion='squared_error',<br>max_depth=6,<br>max_features=None,<br>max_leaf_nodes=None,<br>min_impurity_decrease=0.0, |

---

|                                  |                                                                                                                                                                                                                                                                                                                                                                                                                                                                                                                                                                                                  |
|----------------------------------|--------------------------------------------------------------------------------------------------------------------------------------------------------------------------------------------------------------------------------------------------------------------------------------------------------------------------------------------------------------------------------------------------------------------------------------------------------------------------------------------------------------------------------------------------------------------------------------------------|
|                                  | min_samples_leaf=1,<br>min_samples_split=2,<br>min_weight_fraction_leaf=0.0,<br>random_state=None,<br>splitter='best'),<br>learning_rate=1.0, loss='linear', n_estimators=50,<br>random_state=None)<br>{'n_estimators': 38, 'loss': 'square', 'learning_rate': 1}                                                                                                                                                                                                                                                                                                                                |
| <i>AdaBoostRegressor_MLR</i>     | AdaBoostRegressor(base_estimator=LinearRegression(copy_X=True,<br>fit_intercept=True, n_jobs=None,<br>normalize='deprecated',<br>positive=False),<br>learning_rate=1.0, loss='linear', n_estimators=50,<br>random_state=None)<br>Fitting 5 folds for each of 100 candidates, totalling 500 fits<br>{'n_estimators': 13, 'loss': 'linear', 'learning_rate': 0.05}                                                                                                                                                                                                                                 |
| <i>DecisionTreeRegressor</i>     | best hyperparameters {'splitter': 'best', 'min_weight_fraction_leaf': 0.2,<br>'min_samples_leaf': 2, 'max_leaf_nodes': 194, 'max_features': 'sqrt', 'max_depth': 93}                                                                                                                                                                                                                                                                                                                                                                                                                             |
| <i>GaussianProcessRegressor</i>  | GaussianProcessRegressor(alpha=1e-10, copy_X_train=True, kernel=None,<br>n_restarts_optimizer=0, normalize_y=False,<br>optimizer='fmin_l_bfgs_b', random_state=None)<br>{'kernel': DotProduct(sigma_0=0.1), 'alpha': 1}                                                                                                                                                                                                                                                                                                                                                                          |
| <i>GradientBoostingRegressor</i> | GradientBoostingRegressor(alpha=0.9, ccp_alpha=0.0, criterion='friedman_mse',<br>init=None, learning_rate=0.1, loss='squared_error',<br>max_depth=3, max_features=None, max_leaf_nodes=None,<br>min_impurity_decrease=0.0, min_samples_leaf=1,<br>min_samples_split=2, min_weight_fraction_leaf=0.0,<br>n_estimators=100, n_iter_no_change=None,<br>random_state=None, subsample=1.0, tol=0.0001,<br>validation_fraction=0.1, verbose=0, warm_start=False)<br>{'n_estimators': 57, 'min_samples_split': 2, 'min_samples_leaf': 1, 'max_features':<br>'sqrt', 'max_depth': 8, 'learning_rate': 1} |
| <i>KNeighborsRegressor</i>       | KNeighborsRegressor(algorithm='auto', leaf_size=30, metric='minkowski',<br>metric_params=None, n_jobs=None, n_neighbors=5, p=2,<br>weights='uniform')<br>{'weights': 'distance', 'p': 2, 'n_neighbors': 21, 'metric': 'manhattan', 'leaf_size': 8}                                                                                                                                                                                                                                                                                                                                               |
| <i>MLPRegressor</i>              | MLPRegressor(activation='relu', alpha=0.0001, batch_size='auto', beta_1=0.9,<br>beta_2=0.999, early_stopping=False, epsilon=1e-08,<br>hidden_layer_sizes=(100,), learning_rate='constant',<br>learning_rate_init=0.001, max_fun=15000, max_iter=100000,<br>momentum=0.9, n_iter_no_change=10, nesterovs_momentum=True,<br>power_t=0.5, random_state=None, shuffle=True, solver='adam',<br>tol=0.0001, validation_fraction=0.1, verbose=False,<br>warm_start=False)<br>best hyperparameters {'solver': 'lbfgs', 'learning_rate': 'invscaling',<br>'hidden_layer_sizes': 3, 'activation': 'tanh'}  |
| <i>RandomForestRegressor</i>     | RandomForestRegressor(bootstrap=True, ccp_alpha=0.0, criterion='squared_error',<br>max_depth=None, max_features=1.0, max_leaf_nodes=None,<br>max_samples=None, min_impurity_decrease=0.0,<br>min_samples_leaf=1, min_samples_split=2,<br>min_weight_fraction_leaf=0.0, n_estimators=100,<br>n_jobs=None, oob_score=False, random_state=None,<br>verbose=0, warm_start=False)<br>{'n_estimators': 2, 'min_samples_split': 10, 'min_samples_leaf': 2, 'max_features':<br>'log2', 'max_depth': 5, 'bootstrap': True}                                                                                |
| <i>SupportVectorRegressor</i>    | SVR(C=1.0, cache_size=200, coef0=0.0, degree=3, epsilon=0.1, gamma='scale',<br>kernel='rbf', max_iter=-1, shrinking=True, tol=0.001, verbose=False)<br>best hyperparameters {'kernel': 'sigmoid', 'gamma': 0.0001, 'epsilon': 0.01, 'C': 0.0001}                                                                                                                                                                                                                                                                                                                                                 |

---

**Table S10.** Runtime parameters optimized for ML algorithm predicting  $PS_{ML}$  of complex between  $Pb^{2+}$  and compounds.

| Algorithms                       | Optimized Parameters                                                                                                                                                                                                                                                                                                                                                                                                                                                                                                                                                       |
|----------------------------------|----------------------------------------------------------------------------------------------------------------------------------------------------------------------------------------------------------------------------------------------------------------------------------------------------------------------------------------------------------------------------------------------------------------------------------------------------------------------------------------------------------------------------------------------------------------------------|
| <i>AdaBoostRegressor_DTR</i>     | AdaBoostRegressor(base_estimator=DecisionTreeRegressor(ccp_alpha=0.0, criterion='squared_error', max_depth=6, max_features=None, max_leaf_nodes=None, min_impurity_decrease=0.0, min_samples_leaf=1, min_samples_split=2, min_weight_fraction_leaf=0.0, random_state=None, splitter='best'), learning_rate=1.0, loss='linear', n_estimators=50, random_state=None)<br>{'n_estimators': 8, 'loss': 'linear', 'learning_rate': 0.1}                                                                                                                                          |
| <i>AdaBoostRegressor_MLR</i>     | AdaBoostRegressor(base_estimator=LinearRegression(copy_X=True, fit_intercept=True, n_jobs=None, normalize='deprecated', positive=False), learning_rate=1.0, loss='linear', n_estimators=50, random_state=None)<br>Fitting 5 folds for each of 100 candidates, totalling 500 fits<br>{'n_estimators': 42, 'loss': 'linear', 'learning_rate': 0.1}                                                                                                                                                                                                                           |
| <i>DecisionTreeRegressor</i>     | best hyperparameters {'splitter': 'best', 'min_weight_fraction_leaf': 0.1, 'min_samples_leaf': 2, 'max_leaf_nodes': 49, 'max_features': 'log2', 'max_depth': 177}                                                                                                                                                                                                                                                                                                                                                                                                          |
| <i>GaussianProcessRegressor</i>  | GaussianProcessRegressor(alpha=1e-10, copy_X_train=True, kernel=None, n_restarts_optimizer=0, normalize_y=False, optimizer='fmin_l_bfgs_b', random_state=None)<br>{'kernel': DotProduct(sigma_0=1), 'alpha': 0.0001}                                                                                                                                                                                                                                                                                                                                                       |
| <i>GradientBoostingRegressor</i> | GradientBoostingRegressor(alpha=0.9, ccp_alpha=0.0, criterion='friedman_mse', init=None, learning_rate=0.1, loss='squared_error', max_depth=3, max_features=None, max_leaf_nodes=None, min_impurity_decrease=0.0, min_samples_leaf=1, min_samples_split=2, min_weight_fraction_leaf=0.0, n_estimators=100, n_iter_no_change=None, random_state=None, subsample=1.0, tol=0.0001, validation_fraction=0.1, verbose=0, warm_start=False)<br>{'n_estimators': 20, 'min_samples_split': 2, 'min_samples_leaf': 2, 'max_features': 'sqrt', 'max_depth': 6, 'learning_rate': 0.5} |
| <i>KNeighborsRegressor</i>       | KNeighborsRegressor(algorithm='auto', leaf_size=30, metric='minkowski', metric_params=None, n_jobs=None, n_neighbors=5, p=2, weights='uniform')<br>{'weights': 'distance', 'p': 2, 'n_neighbors': 4, 'metric': 'euclidean', 'leaf_size': 22}                                                                                                                                                                                                                                                                                                                               |
| <i>MLPRegressor</i>              | MLPRegressor(activation='relu', alpha=0.0001, batch_size='auto', beta_1=0.9, beta_2=0.999, early_stopping=False, epsilon=1e-08, hidden_layer_sizes=(100,), learning_rate='constant', learning_rate_init=0.001, max_fun=15000, max_iter=100000, momentum=0.9, n_iter_no_change=10, nesterovs_momentum=True, power_t=0.5, random_state=None, shuffle=True, solver='adam', tol=0.0001, validation_fraction=0.1, verbose=False, warm_start=False)<br>best hyperparameters {'solver': 'adam', 'learning_rate': 'constant', 'hidden_layer_sizes': 51, 'activation': 'identity'}  |
| <i>RandomForestRegressor</i>     | RandomForestRegressor(bootstrap=True, ccp_alpha=0.0, criterion='squared_error', max_depth=None, max_features=1.0, max_leaf_nodes=None,                                                                                                                                                                                                                                                                                                                                                                                                                                     |

|                               |                                                                                                                                                                                                                                                                                                                                                                                                                                                                                                                                                                                                                 |
|-------------------------------|-----------------------------------------------------------------------------------------------------------------------------------------------------------------------------------------------------------------------------------------------------------------------------------------------------------------------------------------------------------------------------------------------------------------------------------------------------------------------------------------------------------------------------------------------------------------------------------------------------------------|
| <i>SupportVectorRegressor</i> | max_samples=None, min_impurity_decrease=0.0,<br>min_samples_leaf=1, min_samples_split=2,<br>min_weight_fraction_leaf=0.0, n_estimators=100,<br>n_jobs=None, oob_score=False, random_state=None,<br>verbose=0, warm_start=False)<br>{'n_estimators': 26, 'min_samples_split': 2, 'min_samples_leaf': 2, 'max_features':<br>'log2', 'max_depth': 5, 'bootstrap': True}<br>SVR(C=1.0, cache_size=200, coef0=0.0, degree=3, epsilon=0.1, gamma='scale',<br>kernel='rbf', max_iter=-1, shrinking=True, tol=0.001, verbose=False)<br>best hyperparameters {'kernel': 'rbf', 'gamma': 0.1, 'epsilon': 0.6, 'C': 100.0} |
|-------------------------------|-----------------------------------------------------------------------------------------------------------------------------------------------------------------------------------------------------------------------------------------------------------------------------------------------------------------------------------------------------------------------------------------------------------------------------------------------------------------------------------------------------------------------------------------------------------------------------------------------------------------|

**Table S11.** Molecular descriptors using in the GA-MLR models.

| Code         | Description                                                                           | Block                       |
|--------------|---------------------------------------------------------------------------------------|-----------------------------|
| RBN          | number of rotatable bonds                                                             | Constitutional indices      |
| SPI          | superpendentic index                                                                  | Topological indices         |
| H_D/Dt       | Harary-like index from distance/detour matrix                                         | 2D matrix-based descriptors |
| MATS1m       | Moran autocorrelation of lag 1 weighted by mass                                       | 2D autocorrelations         |
| MATS2m       | Moran autocorrelation of lag 2 weighted by mass                                       | 2D autocorrelations         |
| MATS6i       | Moran autocorrelation of lag 6 weighted by ionization potential                       | 2D autocorrelations         |
| nHM          | number of heavy atoms                                                                 | Constitutional indices      |
| ATSC4e       | Centred Broto-Moreau autocorrelation of lag 4 weighted by Sanderson electronegativity | 2D autocorrelations         |
| MATS1v       | Moran autocorrelation of lag 1 weighted by van der Waals volume                       | 2D autocorrelations         |
| MATS6p       | Moran autocorrelation of lag 6 weighted by polarizability                             | 2D autocorrelations         |
| MATS7p       | Moran autocorrelation of lag 7 weighted by polarizability                             | 2D autocorrelations         |
| GATS5p       | Geary autocorrelation of lag 5 weighted by polarizability                             | 2D autocorrelations         |
| P_VSA_MR_7   | P_VSA-like on Molar Refractivity, bin 7                                               | P_VSA-like descriptors      |
| SM07_AEA(ed) | spectral moment of order 7 from augmented edge adjacency mat. weighted by edge degree | Edge adjacency indices      |
| O-057        | phenol / enol / carboxyl OH                                                           | Atom-centered fragments     |
| NssCH2       | Number of atoms of type ssCH2                                                         | Atom-type E-state indices   |
| B06[C-O]     | Presence/absence of C - O at topological distance 6                                   | 2D Atom Pairs               |
| nR05         | number of 5-membered rings                                                            | Ring descriptors            |
| J_Dt         | Balaban-like index from detour matrix                                                 | 2D matrix-based descriptors |
| ATSC1s       | Centred Broto-Moreau autocorrelation of lag 1 weighted by I-state                     | 2D autocorrelations         |
| GATS8m       | Geary autocorrelation of lag 8 weighted by mass                                       | 2D autocorrelations         |
| SM03_EA(bo)  | spectral moment of order 3 from edge adjacency mat. weighted by bond order            | Edge adjacency indices      |
| J_B(s)       | Balaban-like index from Burden matrix weighted by I-State                             | 2D matrix-based descriptors |
| GATS8i       | Geary autocorrelation of lag 8 weighted by ionization potential                       | 2D autocorrelations         |
| JGI8         | mean topological charge index of order 8                                              | 2D autocorrelations         |
| SpMax4_Bh(m) | largest eigenvalue n. 4 of Burden matrix weighted by mass                             | Burden eigenvalues          |
| SpMin3_Bh(s) | smallest eigenvalue n. 3 of Burden matrix weighted by I-state                         | Burden eigenvalues          |
| SpMin5_Bh(s) | smallest eigenvalue n. 5 of Burden matrix weighted by I-state                         | Burden eigenvalues          |
| DLS_01       | modified drug-like score from Lipinski (4 rules)                                      | Drug-like indices           |
| Ho_Dz(p)     | Hosoya-like index (log function) from Barysz matrix weighted by polarizability        | 2D matrix-based descriptors |
| GGI10        | topological charge index of order 10                                                  | 2D autocorrelations         |
| P_VSA_p_2    | P_VSA-like on polarizability, bin 2                                                   | P_VSA-like descriptors      |

|             |                                                                                          |                        |
|-------------|------------------------------------------------------------------------------------------|------------------------|
| Chi1_EA(dm) | connectivity-like index of order 1 from edge adjacency mat.<br>weighted by dipole moment | Edge adjacency indices |
| DLS_04      | modified drug-like score from Chen et al. (7 rules)                                      | Drug-like indices      |
| LLS_01      | modified lead-like score from Congreve et al. (6 rules)                                  | Drug-like indices      |
| MATS6v      | Moran autocorrelation of lag 6 weighted by van der Waals<br>volume                       | 2D autocorrelations    |
| MATS2i      | Moran autocorrelation of lag 2 weighted by ionization<br>potential                       | 2D autocorrelations    |
| GATS4i      | Geary autocorrelation of lag 4 weighted by ionization<br>potential                       | 2D autocorrelations    |
| GGI8        | topological charge index of order 8                                                      | 2D autocorrelations    |
| Eta_F_A     | eta average functionality index                                                          | ETA indices            |

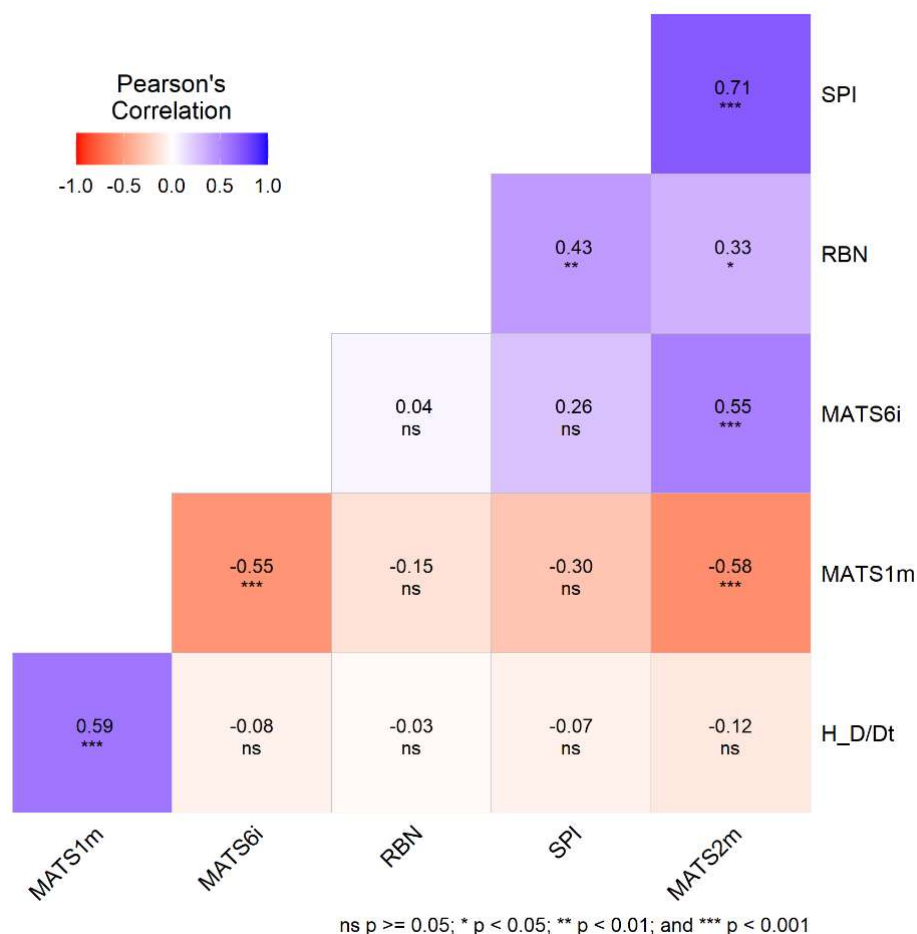

**Figure S3.** Correlation matrix of molecular descriptors selected in Cd<sup>2+</sup> log $\beta$  QSPR model.



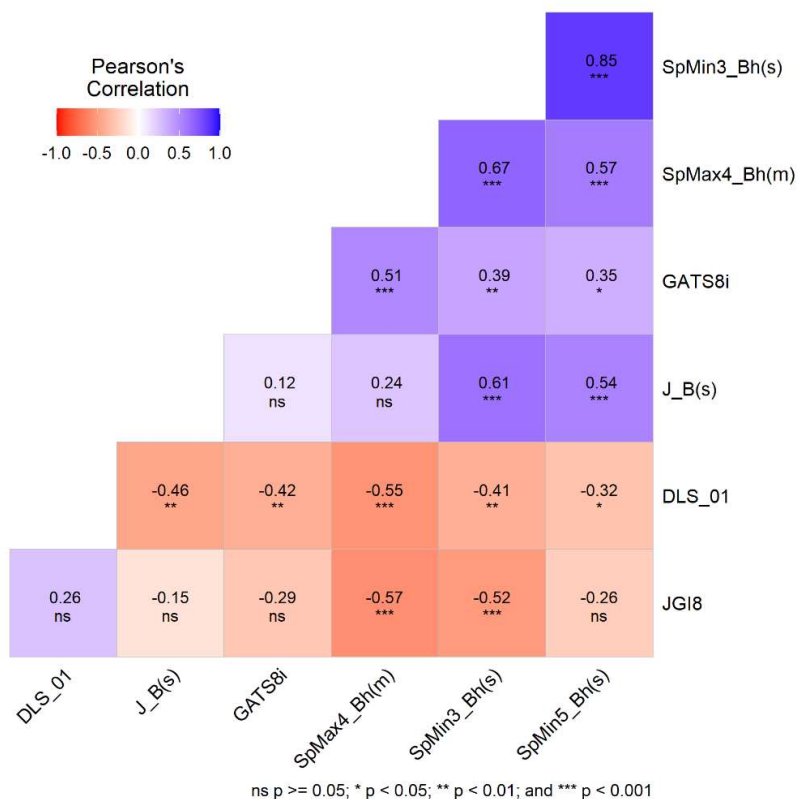

**Figure S4.** Correlation matrix of molecular descriptors selected in  $\text{Cd}^{2+}$  PS<sub>ML</sub> QSPR model.

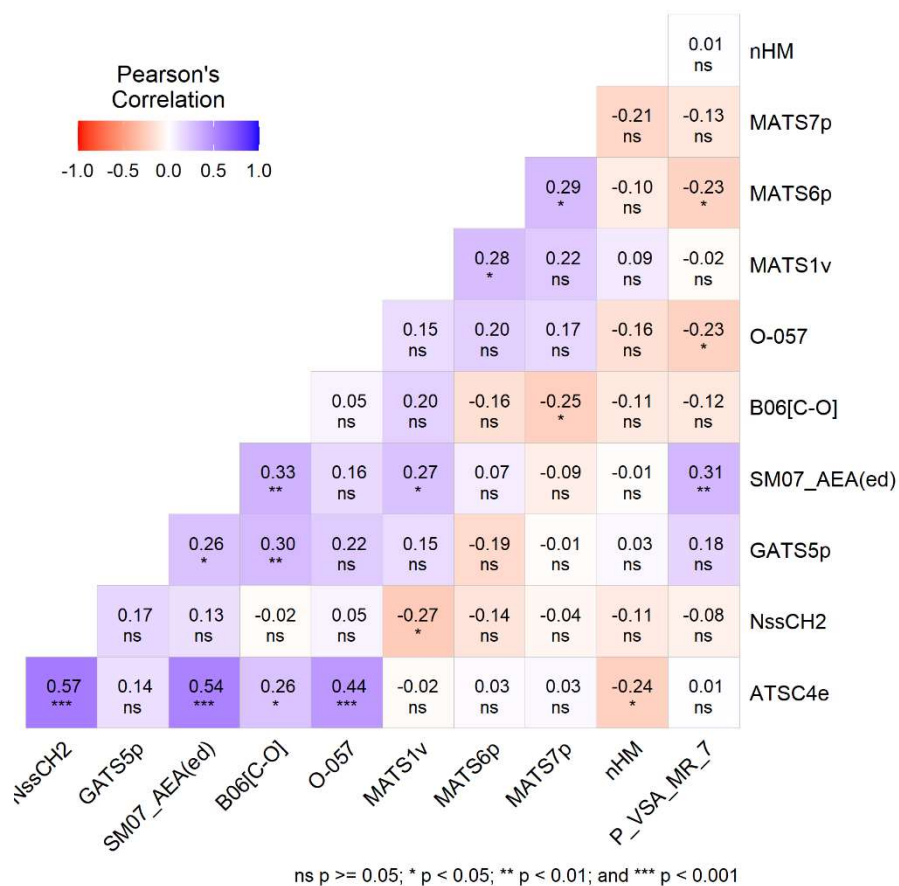

**Figure S5.** Correlation matrix of molecular descriptors selected in  $\text{Cu}^{2+}$   $\log\beta$  QSPR model.

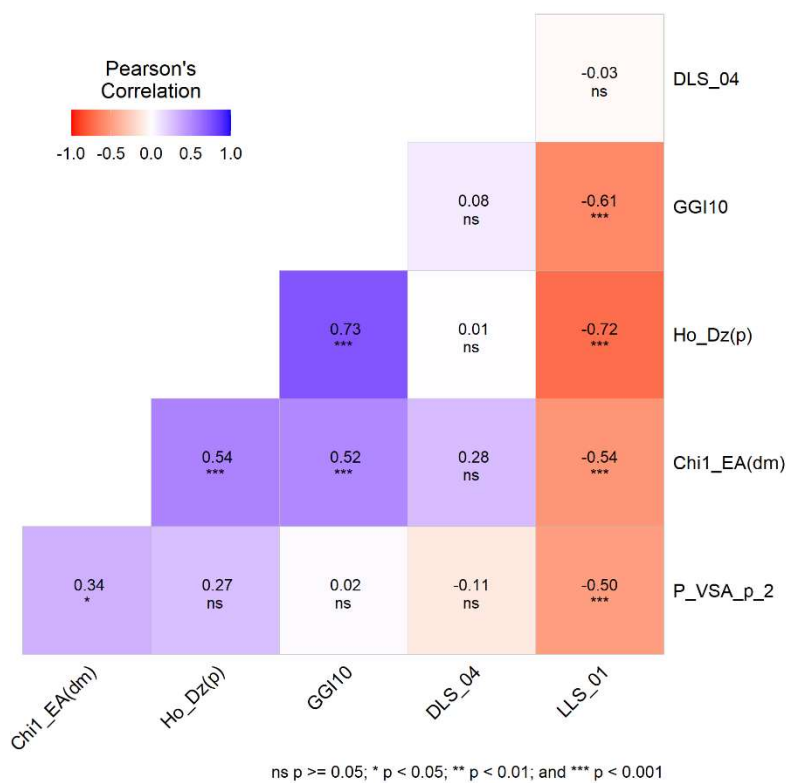

**Figure S6.** Correlation matrix of molecular descriptors selected in  $\text{Cu}^{2+}$  PS<sub>ML</sub> QSPR model.

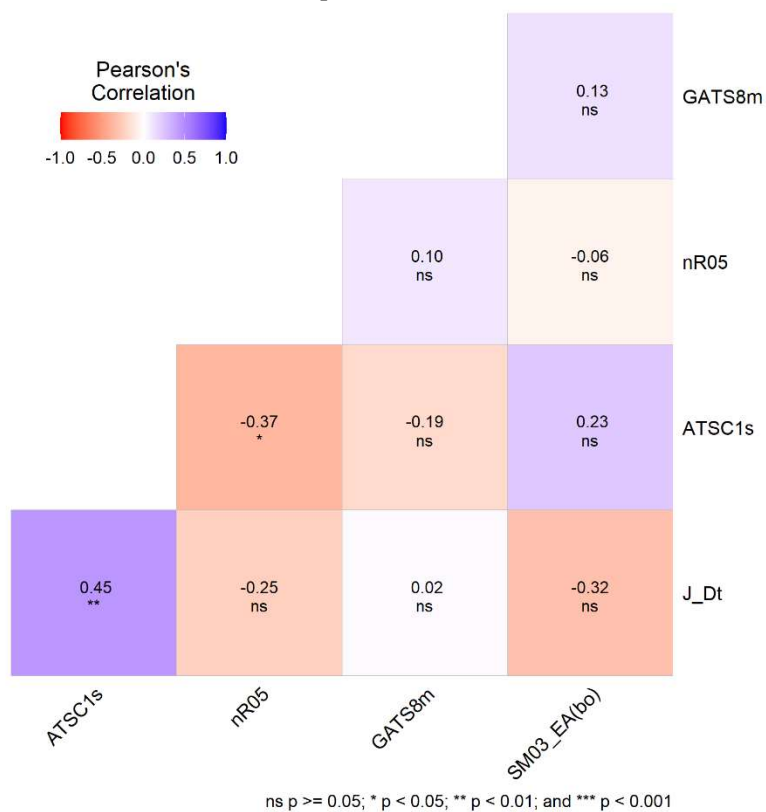

**Figure S7.** Correlation matrix of molecular descriptors selected in  $\text{Pb}^{2+}$  log $\beta$  QSPR model.

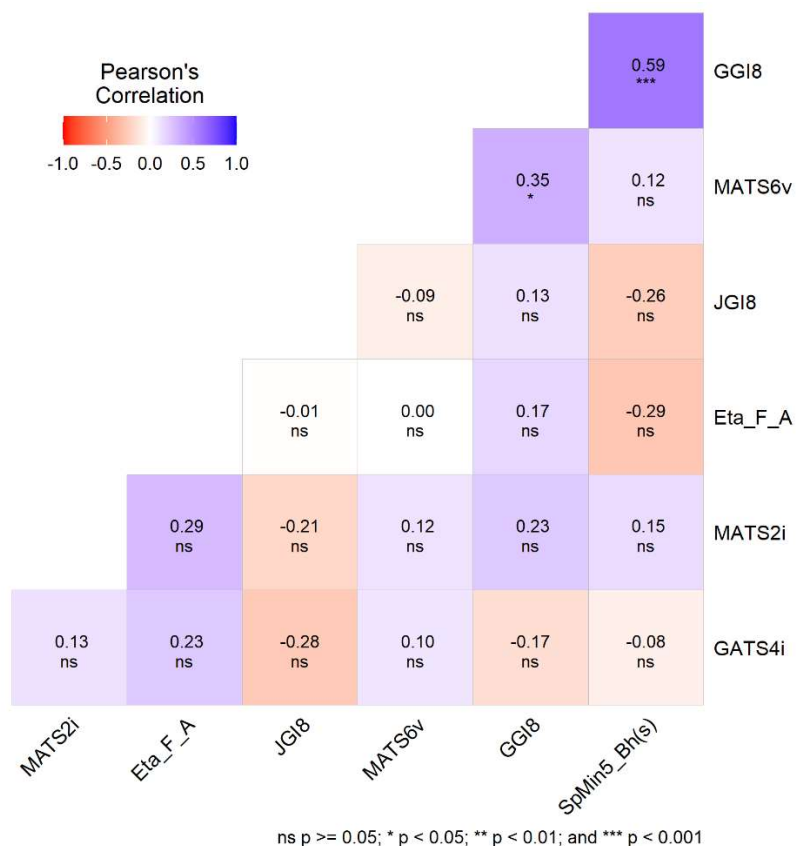

**Figure S8.** Correlation matrix of molecular descriptors selected in  $\text{Pb}^{2+}$  PS<sub>ML</sub> QSPR model.

**Table S12.** Performance comparison between GA-MLR and ML models for predicting  $\log\beta$  of complex between  $\text{Cd}^{2+}$  and compounds.

| Algorithms                 | $R^2$ k-fold cross-validation | $Q^2$ external test set |
|----------------------------|-------------------------------|-------------------------|
| Nonlinear Regression       | 0.925724                      | 0.812039                |
| AdaBoost Regressor MLR     | 0.921837                      | 0.81617                 |
| Gaussian Process Regressor | 0.894938                      | 0.805267                |
| Random Forest Regressor    | 0.796154                      | 0.80026                 |
| The best MLR model         | 0.9079                        | 0.812                   |

**Table S13.** Performance comparison between GA-MLR and ML models for predicting PS<sub>ML</sub> of complex between  $\text{Cd}^{2+}$  and compounds.

| Algorithms                 | $R^2$ k-fold cross-validation | $Q^2$ external test set |
|----------------------------|-------------------------------|-------------------------|
| GradientBoostingRegressor  | 1.000                         | 0.948434061             |
| Random Forest Regressor    | 0.999722244                   | 0.897113502             |
| AdaBoost Regressor DT      | 0.999263294                   | 0.941271334             |
| AdaBoost Regressor MLR     | 0.91949539                    | 0.879032755             |
| Nonlinear Regression       | 0.91597577                    | 0.878878122             |
| MLP Regressor              | 0.915974282                   | 0.878615791             |
| Gaussian Process Regressor | 0.906771339                   | 0.903436134             |
| The best MLR model         | 0.916                         | 0.896166667             |

**Table S14.** Performance comparison between GA-MLR and ML models for predicting  $\log\beta$  of complex between  $\text{Cu}^{2+}$  and compounds.

| Algorithms                        | $R^2$ k-fold cross-validation | $Q^2$ external test set |
|-----------------------------------|-------------------------------|-------------------------|
| <i>AdaBoost Regressor DT</i>      | 0.984825171                   | 0.7199684               |
| <i>AdaBoost Regressor MLR</i>     | 0.913765445                   | 0.82809407              |
| <i>Nonlinear Regression</i>       | 0.908522824                   | 0.827603944             |
| <i>MLP Regressor</i>              | 0.908522741                   | 0.827610512             |
| <i>Gaussian Process Regressor</i> | 0.908519552                   | 0.827651378             |
| <i>Support Vector Regressor</i>   | 0.901498761                   | 0.808066825             |
| <i>The best MLR model</i>         | 0.8862                        | 0.8326                  |

**Table S15.** Performance comparison between GA-MLR and ML models for predicting  $\text{PS}_{\text{ML}}$  of complex between  $\text{Cu}^{2+}$  and compounds.

| Algorithms                         | $R^2$ k-fold cross-validation | $Q^2$ external test set |
|------------------------------------|-------------------------------|-------------------------|
| <i>Gradient Boosting Regressor</i> | 0.999999904                   | 0.709534709             |
| <i>AdaBoost Regressor MLR</i>      | 0.89802849                    | 0.816214429             |
| <i>Nonlinear Regression</i>        | 0.890398658                   | 0.879333515             |
| <i>MLP Regressor</i>               | 0.890398605                   | 0.879418781             |
| <i>Gaussian Process Regressor</i>  | 0.888774511                   | 0.87817946              |
| <i>Support Vector Regressor</i>    | 0.884442409                   | 0.901160709             |
| <i>The best MLR model</i>          | 0.8669                        | 0.859566667             |

**Table S16.** Performance comparison between GA-MLR and ML models for predicting  $\log\beta$  of complex between  $\text{Pb}^{2+}$  and compounds.

| Algorithms                         | $R^2$ k-fold cross-validation | $Q^2$ external test set |
|------------------------------------|-------------------------------|-------------------------|
| <i>Gradient Boosting Regressor</i> | 1.000                         | 0.847080049             |
| <i>AdaBoost Regressor DT</i>       | 0.95625577                    | 0.664698943             |
| <i>MLP Regressor</i>               | 0.90313783                    | 0.853574424             |
| <i>Nonlinear Regression</i>        | 0.808369698                   | 0.630501768             |
| <i>The best MLR model</i>          | 0.8084                        | 0.6305                  |

**Table S17.** Performance comparison between GA-MLR and ML models for predicting  $\text{PS}_{\text{ML}}$  of complex between  $\text{Pb}^{2+}$  and compounds.

| Algorithms                        | $R^2$ k-fold cross-validation | $Q^2$ Test set |
|-----------------------------------|-------------------------------|----------------|
| <i>Nonlinear Regression</i>       | 0.925724257                   | 0.812039297    |
| <i>AdaBoost Regressor MLR</i>     | 0.92183658                    | 0.816170429    |
| <i>Gaussian Process Regressor</i> | 0.894938001                   | 0.805266602    |
| <i>Random Forest Regressor</i>    | 0.796154256                   | 0.800259789    |
| <i>The best MLR model</i>         | 0.908                         | 0.7289         |

**Table S18.** Log $\beta$  and P $S_{ML}$  parameter predictions for virtual chemical library based on corresponding QSPR models.

| Cpd. ID | log $\beta$ Cd <sup>2+</sup> -L | log $\beta$ Cu <sup>2+</sup> -L | log $\beta$ Pb <sup>2+</sup> -L | PSCd <sup>2+</sup> -L | PSCu <sup>2+</sup> -L | PSPb <sup>2+</sup> -L |
|---------|---------------------------------|---------------------------------|---------------------------------|-----------------------|-----------------------|-----------------------|
| NEW01   | 7.2299                          | 6.2157                          | 3.3078                          | 8.7302                | 27.3728               | 25.1919               |
| NEW02   | <b>9.5366</b>                   | <b>9.0221</b>                   | <b>3.1326</b>                   | <b>6.1456</b>         | <b>13.8088</b>        | <b>16.1353</b>        |
| NEW03   | <b>10.2625</b>                  | <b>9.6099</b>                   | <b>2.9345</b>                   | <b>7.9005</b>         | <b>16.1938</b>        | <b>16.9472</b>        |
| NEW04   | 6.7047                          | 3.4281                          | 2.0696                          | 13.6479               | 32.4903               | 28.5516               |
| NEW05   | 6.5049                          | 5.7129                          | 1.7343                          | 26.8981               | 47.3703               | 23.5674               |
| NEW06   | 7.4011                          | 6.7300                          | 2.3939                          | 15.6932               | 41.1356               | 24.1475               |
| NEW07   | <b>8.2776</b>                   | <b>8.8702</b>                   | <b>4.3037</b>                   | <b>4.5160</b>         | <b>5.5176</b>         | <b>17.9727</b>        |
| NEW08   | 5.9427                          | 3.9873                          | 2.1182                          | 14.2646               | 41.3550               | 27.8020               |
| NEW09   | 5.9353                          | 2.1858                          | 1.3775                          | 26.0268               | 39.6955               | 28.8286               |
| NEW10   | 4.3961                          | 6.6666                          | 1.1218                          | 10.6837               | 22.1229               | 25.1430               |
| NEW11   | 3.8955                          | 2.3925                          | 2.3358                          | 17.8985               | 35.3738               | 21.0525               |
| NEW12   | 3.9942                          | 4.7579                          | 1.9680                          | 21.1548               | 43.8542               | 29.9012               |
| NEW13   | 6.0639                          | 5.4509                          | 1.5857                          | 21.0120               | 26.7694               | 31.3223               |
| NEW14   | 4.1477                          | 4.3792                          | 2.8353                          | 9.7048                | 24.1167               | 25.3185               |
| NEW15   | 5.9427                          | 3.9873                          | 2.1182                          | 14.2646               | 41.3550               | 27.8020               |
| NEW16   | 7.0546                          | 7.4936                          | 2.0028                          | 18.2902               | 48.2008               | 19.2659               |
| NEW17   | 8.4495                          | 5.9013                          | 1.2629                          | 17.2032               | 43.3520               | 30.9070               |
| NEW18   | 5.0191                          | 2.9372                          | 1.2920                          | 8.1171                | 45.3264               | 23.1692               |
| NEW19   | 3.6735                          | 7.6125                          | 2.1332                          | 22.2732               | 42.8704               | 22.8907               |
| NEW20   | 7.2263                          | 7.9642                          | 1.1124                          | 22.8437               | 31.0370               | 29.7044               |
| NEW21   | <b>6.9122</b>                   | <b>5.5059</b>                   | <b>4.0236</b>                   | <b>4.7459</b>         | <b>22.3069</b>        | <b>16.8122</b>        |
| NEW22   | 7.8321                          | 8.0161                          | 3.8116                          | 28.0867               | 46.6198               | 27.7988               |
| NEW23   | 4.7849                          | 3.2686                          | 2.7758                          | 7.3873                | 46.4206               | 21.9786               |
| NEW24   | 7.7830                          | 7.4738                          | 1.3868                          | 12.3757               | 26.9581               | 29.6085               |
| NEW25   | 3.2838                          | 5.6766                          | 1.1455                          | 14.8074               | 26.4679               | 22.2587               |
| NEW26   | <b>7.0869</b>                   | <b>7.7013</b>                   | <b>2.5389</b>                   | <b>7.2298</b>         | <b>34.3599</b>        | <b>27.2861</b>        |
| NEW27   | 3.4714                          | 6.5216                          | 2.4352                          | 10.3017               | 43.2585               | 29.3693               |
| NEW28   | 7.8051                          | 3.6398                          | 1.5326                          | 13.2976               | 42.1579               | 27.8926               |
| NEW29   | 2.6921                          | 2.2182                          | 2.0532                          | 17.3256               | 17.9481               | 26.9962               |
| NEW30   | 7.9301                          | 4.3473                          | 2.5967                          | 9.3132                | 45.0338               | 19.1306               |
| NEW31   | 2.4407                          | 3.9638                          | 1.2911                          | 13.9341               | 44.1849               | 19.2181               |
| NEW32   | 4.0845                          | 5.3336                          | 2.6840                          | 23.2887               | 30.6075               | 31.1596               |
| NEW33   | 2.3771                          | 6.6561                          | 1.7555                          | 21.2558               | 31.8574               | 30.7486               |
| NEW34   | <b>6.5502</b>                   | <b>6.6073</b>                   | <b>3.4345</b>                   | <b>4.2357</b>         | <b>28.9751</b>        | <b>23.5070</b>        |
| NEW35   | 2.0748                          | 3.1554                          | 2.4332                          | 10.0122               | 25.0810               | 20.0914               |
| NEW36   | 7.1972                          | 5.4692                          | 2.0355                          | 16.9356               | 43.1862               | 23.0296               |
| NEW37   | 6.4996                          | 4.4118                          | 2.0823                          | 15.2367               | 38.0352               | 21.6537               |
| NEW38   | 2.6301                          | 7.2491                          | 2.4218                          | 25.4922               | 42.2618               | 19.1759               |
| NEW39   | 6.2306                          | 4.8096                          | 1.7720                          | 11.5485               | 47.3764               | 21.9894               |
| NEW40   | 7.8763                          | 7.3694                          | 2.7352                          | 20.7155               | 40.9639               | 20.3910               |
| NEW41   | 4.6427                          | 2.2374                          | 2.7113                          | 20.1505               | 35.4517               | 30.4258               |
| NEW42   | 7.1477                          | 4.4264                          | 1.8435                          | 19.8252               | 41.1344               | 25.7951               |
| NEW43   | 3.6335                          | 3.8462                          | 2.9087                          | 19.9432               | 48.8608               | 23.1474               |
| NEW44   | 7.4535                          | 2.9242                          | 2.7475                          | 13.7177               | 42.2348               | 27.4428               |
| NEW45   | 3.3601                          | 6.7990                          | 2.9391                          | 11.9799               | 39.2027               | 22.0011               |
| NEW46   | 5.8075                          | 5.4723                          | 2.4170                          | 23.0268               | 35.3789               | 24.1608               |
| NEW47   | 7.0350                          | 6.7095                          | 2.8926                          | 8.7249                | 30.4211               | 30.9279               |
| NEW48   | 8.8210                          | 4.2791                          | 2.2376                          | 21.0566               | 27.5683               | 24.8222               |
| NEW49   | 1.9762                          | 7.8223                          | 2.2923                          | 8.5261                | 28.7520               | 20.5893               |
| NEW50   | 6.6665                          | 2.2263                          | 2.1803                          | 25.4796               | 23.2913               | 27.0648               |
| NEW51   | <b>9.5662</b>                   | <b>9.2518</b>                   | <b>2.6083</b>                   | <b>8.1187</b>         | <b>30.9020</b>        | <b>21.5195</b>        |
| NEW52   | 4.9879                          | 4.1479                          | 2.0487                          | 24.7167               | 23.7333               | 22.4432               |
| NEW53   | 6.8560                          | 6.6958                          | 1.0996                          | 15.3090               | 31.1021               | 29.2352               |
| NEW54   | 8.2729                          | 3.8759                          | 2.6596                          | 19.1724               | 39.1489               | 27.3762               |

|        |               |               |               |               |                |                |
|--------|---------------|---------------|---------------|---------------|----------------|----------------|
| NEW55  | 8.1645        | 6.6975        | 1.6665        | 24.8623       | 45.0272        | 24.3059        |
| NEW56  | 1.6543        | 6.4612        | 2.8792        | 6.2272        | 23.0518        | 29.5758        |
| NEW57  | 1.6898        | 3.2218        | 2.1147        | 19.3600       | 16.9656        | 26.3104        |
| NEW58  | 1.1533        | 2.1791        | 1.8404        | 12.4207       | 16.5668        | 20.7855        |
| NEW59  | 8.7145        | 5.6998        | 1.7908        | 11.2607       | 21.9079        | 27.9829        |
| NEW60  | 3.3158        | 6.6195        | 1.8194        | 7.7992        | 47.9358        | 23.8375        |
| NEW61  | 4.9352        | 5.0315        | 1.6906        | 25.0250       | 39.4105        | 21.1388        |
| NEW62  | 6.0896        | 5.6101        | 1.9721        | 7.9151        | 40.2836        | 19.6851        |
| NEW63  | 7.5917        | 2.8304        | 2.1447        | 24.3250       | 31.4192        | 30.9164        |
| NEW64  | 1.0187        | 4.2657        | 2.4624        | 17.7459       | 19.1249        | 19.5308        |
| NEW65  | 2.8927        | 2.0359        | 1.2955        | 9.3647        | 29.6794        | 28.4441        |
| NEW66  | 4.0900        | 7.1128        | 1.2212        | 7.2629        | 34.4103        | 23.3638        |
| NEW67  | 4.5701        | 4.9775        | 1.4525        | 21.1858       | 22.9043        | 29.5330        |
| NEW68  | 6.5826        | 4.6317        | 1.9609        | 15.7758       | 17.6500        | 26.2751        |
| NEW69  | 4.3163        | 7.7149        | 2.4439        | 19.9216       | 18.9900        | 28.1609        |
| NEW70  | 4.3474        | 7.0819        | 1.7218        | 24.6569       | 47.2808        | 25.7825        |
| NEW71  | 7.2505        | 5.4229        | 1.5226        | 17.6207       | 19.1627        | 27.9053        |
| NEW72  | 3.8564        | 7.2473        | 1.7698        | 25.1541       | 45.2664        | 29.2653        |
| NEW73  | 8.9248        | 7.4060        | 1.6575        | 10.3770       | 34.8656        | 20.6891        |
| NEW74  | 2.6450        | 7.7631        | 1.5381        | 11.2492       | 43.8565        | 26.7890        |
| NEW75  | 6.6214        | 6.5344        | 1.8749        | 21.5455       | 17.4935        | 21.9733        |
| NEW76  | 2.5577        | 5.5167        | 2.6695        | 10.7763       | 43.5086        | 29.1711        |
| NEW77  | 4.5751        | 7.0862        | 2.3664        | 9.1689        | 20.0526        | 29.8286        |
| NEW78  | 5.0978        | 5.2523        | 1.8707        | 18.8639       | 15.4483        | 26.7806        |
| NEW79  | 5.0567        | 7.7973        | 2.7347        | 25.7360       | 40.9123        | 27.1178        |
| NEW80  | <b>6.9634</b> | <b>4.2819</b> | <b>3.8906</b> | <b>8.0437</b> | <b>15.6780</b> | <b>13.5199</b> |
| NEW81  | 5.9565        | 7.3462        | 2.7350        | 11.3116       | 27.4177        | 22.4807        |
| NEW82  | 8.0368        | 4.4904        | 2.6003        | 14.1775       | 20.2919        | 28.8381        |
| NEW83  | 7.4498        | 5.5964        | 1.6470        | 17.4808       | 48.1288        | 31.4523        |
| NEW84  | 3.5829        | 6.2591        | 1.3910        | 23.5404       | 24.3348        | 23.8976        |
| NEW85  | 4.6850        | 6.1152        | 2.9339        | 13.4108       | 43.5568        | 22.5463        |
| NEW86  | 6.4575        | 4.2391        | 1.0849        | 16.1790       | 31.3893        | 29.7753        |
| NEW87  | 1.4698        | 4.5507        | 2.9132        | 14.6397       | 37.1117        | 25.3129        |
| NEW88  | 7.9420        | 2.5621        | 2.4061        | 8.3417        | 20.6945        | 26.4133        |
| NEW89  | 2.6721        | 5.0474        | 1.5498        | 16.0166       | 24.2345        | 28.3751        |
| NEW90  | 7.5706        | 6.5180        | 1.0139        | 23.9898       | 32.7768        | 29.2826        |
| NEW91  | 1.6811        | 2.4509        | 1.4419        | 23.6841       | 31.2580        | 24.5005        |
| NEW92  | 4.3572        | 5.2104        | 1.9836        | 19.9855       | 42.6401        | 20.5510        |
| NEW93  | 3.3335        | 5.6488        | 2.9198        | 14.9967       | 24.8512        | 25.7150        |
| NEW94  | 2.3031        | 7.4279        | 1.7588        | 16.2310       | 27.5513        | 22.5189        |
| NEW95  | 2.4815        | 5.4395        | 1.8069        | 10.2280       | 33.5801        | 26.7573        |
| NEW96  | 1.4007        | 7.8755        | 2.0496        | 18.9764       | 30.1319        | 29.1028        |
| NEW97  | 6.3741        | 6.7618        | 1.4193        | 6.7112        | 28.3528        | 26.4166        |
| NEW98  | 5.2091        | 4.8873        | 1.2829        | 6.8880        | 15.3672        | 21.3310        |
| NEW99  | 3.1151        | 6.2603        | 2.3805        | 6.5489        | 38.4944        | 23.0382        |
| NEW100 | 8.8038        | 3.0151        | 1.0658        | 23.5426       | 39.9104        | 26.8141        |
| NEW101 | 1.7817        | 3.0886        | 2.0405        | 6.9137        | 28.2965        | 29.4521        |
| NEW102 | 2.8379        | 5.7159        | 1.6366        | 24.8809       | 20.8408        | 31.6558        |
| NEW103 | 4.1491        | 2.7742        | 2.6297        | 19.3234       | 43.7813        | 25.6351        |
| NEW104 | 3.8282        | 7.1541        | 2.2413        | 18.6354       | 35.0084        | 31.7499        |
| NEW105 | 2.1381        | 6.4219        | 2.5499        | 8.1758        | 25.5342        | 31.8863        |
| NEW106 | 7.5371        | 4.2630        | 2.4058        | 18.1523       | 43.9213        | 25.3129        |
| NEW107 | 4.2194        | 2.5405        | 1.2075        | 21.4832       | 47.0184        | 29.3493        |
| NEW108 | 8.6902        | 2.9129        | 1.1785        | 23.2004       | 36.9826        | 23.8585        |
| NEW109 | 7.0808        | 6.4475        | 2.9064        | 26.1702       | 42.9831        | 21.6406        |
| NEW110 | 6.7982        | 7.8291        | 1.7667        | 13.2933       | 18.8921        | 26.4585        |
| NEW111 | 1.9653        | 3.0520        | 2.1439        | 11.6289       | 48.0089        | 22.3121        |
| NEW112 | 3.2786        | 5.2025        | 2.9979        | 22.4588       | 19.5708        | 23.3902        |

|        |        |        |        |         |         |         |
|--------|--------|--------|--------|---------|---------|---------|
| NEW113 | 5.5018 | 6.5269 | 2.5301 | 6.6104  | 17.2804 | 26.8373 |
| NEW114 | 7.8935 | 5.3341 | 2.2297 | 23.0358 | 28.1115 | 31.6892 |
| NEW115 | 3.8525 | 5.5194 | 2.2790 | 21.5286 | 30.7347 | 24.4923 |
| NEW116 | 7.1269 | 3.3690 | 1.5033 | 14.0852 | 45.1590 | 27.0585 |
| NEW117 | 2.2230 | 6.3289 | 1.9186 | 15.6836 | 24.5852 | 22.9292 |
| NEW118 | 7.3738 | 2.2777 | 2.8597 | 24.5596 | 25.0328 | 30.1009 |
| NEW119 | 7.8091 | 4.4351 | 2.0492 | 18.0294 | 19.5008 | 30.2548 |
| NEW120 | 5.6282 | 6.5053 | 2.8463 | 7.1527  | 15.6546 | 26.1429 |
| NEW121 | 3.9253 | 6.6915 | 1.6699 | 6.1637  | 32.1216 | 31.8265 |
| NEW122 | 2.9809 | 6.6528 | 1.2116 | 18.3855 | 24.6645 | 20.4093 |
| NEW123 | 3.1408 | 3.0533 | 2.7905 | 22.3401 | 44.0674 | 27.1524 |
| NEW124 | 6.3213 | 7.6312 | 1.1591 | 11.1617 | 41.5585 | 25.1247 |
| NEW125 | 4.6233 | 4.2032 | 1.2329 | 7.6455  | 39.5289 | 31.5880 |
| NEW126 | 7.7785 | 6.0622 | 1.0006 | 10.1562 | 22.7337 | 21.3444 |
| NEW127 | 5.7653 | 7.5126 | 2.6909 | 15.6622 | 46.4079 | 28.2403 |
| NEW128 | 3.2376 | 2.7069 | 1.4121 | 18.1700 | 35.2912 | 26.6503 |
| NEW129 | 7.4075 | 3.3918 | 1.4222 | 11.1651 | 23.1546 | 26.3452 |

**Table S19.** SMILES code of 8 new coumarin-like structures and their leverage value ( $h_i$ ) computed by 6 QSPR models.

| Cpd. ID                                   | SMILES                                             | Leverage value ( $h_i$ )  |                           |                           |                     |                     |                     |
|-------------------------------------------|----------------------------------------------------|---------------------------|---------------------------|---------------------------|---------------------|---------------------|---------------------|
|                                           |                                                    | AD -<br>Log $\beta_{CdL}$ | AD -<br>Log $\beta_{CuL}$ | AD -<br>Log $\beta_{PbL}$ | AD -<br>PS $_{CdL}$ | AD -<br>PS $_{CuL}$ | AD -<br>PS $_{PbL}$ |
| NEW02                                     | SC1=CC=CC=C1/C=N/C2=CC3=C(C=C2)C(C)=CC(O3)=O       | 0.1085                    | 0.1925                    | 0.0916                    | 0.2375              | 0.2943              | 0.5894              |
| NEW03                                     | SC1=CC=C(/C=N/C2=CC3=C(C(C)=CC(O3)=O)C=C2)C(S)=C1  | 0.2993                    | 0.3159                    | 0.0899                    | 0.2177              | 0.3028              | 0.477               |
| NEW07                                     | OC1=CC=CC=C1/C=N/C2=C(O)C3=C(C(C)=CC(O3)=O)C=C2    | 0.1592                    | 0.1281                    | 0.0737                    | 0.2529              | 0.4298              | 0.2202              |
| NEW21                                     | NC1=CC=CC=C1/C=N/C2=C(N)C3=C(C(C)=CC(O3)=O)C=C2    | 0.2133                    | 0.1233                    | 0.0723                    | 0.2676              | 0.1899              | 0.2018              |
| NEW26                                     | CC(C(C=C1)=C2C=C1/N=C/C(C(N)=C3)=CC=C3NC)=CC(O2)=O | 0.2302                    | 0.2333                    | 0.1024                    | 0.2084              | 0.233               | 0.3437              |
| NEW34                                     | NC1=CC=CC=C1/C=N/C2=CC3=C(C(C)=CC(O3)=O)C=C2       | 0.1683                    | 0.1281                    | 0.0796                    | 0.2546              | 0.2365              | 0.3958              |
| NEW51                                     | SC1=CC(SC)=CC=C1/C=N/C2=CC3=C(C(C)=CC(O3)=O)C=C2   | 0.1843                    | 0.1155                    | 0.1075                    | 0.1393              | 0.5251              | 0.3362              |
| NEW80                                     | O=C(OCC1=NC=CC=C1)C2=CC3=CC=C(C=C3OC2=O            | 0.0827                    | 0.213                     | 0.0772                    | 0.4016              | 0.1703              | 0.3547              |
| Critical leverage of each model ( $h^*$ ) |                                                    | 0.6563                    | 0.6316                    | 0.6429                    | 0.6486              | 0.6000              | 0.6667              |

**Table S20.** Physicochemical and absorption, distribution, metabolism, and excretion (ADME) properties of three candidates based on SwissADME tool.

| Molecule                  | NEW02                                             | NEW03                                                          | NEW07                                           |
|---------------------------|---------------------------------------------------|----------------------------------------------------------------|-------------------------------------------------|
| Formula                   | C <sub>17</sub> H <sub>13</sub> NO <sub>2</sub> S | C <sub>17</sub> H <sub>13</sub> NO <sub>2</sub> S <sub>2</sub> | C <sub>17</sub> H <sub>13</sub> NO <sub>4</sub> |
| MW                        | 295.36                                            | 327.42                                                         | 295.29                                          |
| #Heavy atoms              | 21                                                | 22                                                             | 22                                              |
| #Aromatic heavy atoms     | 16                                                | 16                                                             | 16                                              |
| Fraction Csp <sup>3</sup> | 0.06                                              | 0.06                                                           | 0.06                                            |
| #Rotatable bonds          | 2                                                 | 2                                                              | 2                                               |
| #H-bond acceptors         | 3                                                 | 3                                                              | 5                                               |

|                                |                    |                    |                    |
|--------------------------------|--------------------|--------------------|--------------------|
| #H-bond donors                 | 0                  | 0                  | 2                  |
| Molar Refractivity             | 88.4               | 95.65              | 85.19              |
| TPSA                           | 81.37              | 120.17             | 83.03              |
| iLOGP                          | 2.98               | 3.11               | 2.21               |
| WLOGP                          | 4.14               | 4.43               | 3.26               |
| MLOGP                          | 3.16               | 3.43               | 1.75               |
| Consensus LogP                 | 3.82               | 4.04               | 2.7                |
| ESOL LogS                      | -4.44              | -4.71              | -3.6               |
| ESOL Solubility (mg/ml)        | 1.07E-02           | 6.41E-03           | 7.50E-02           |
| ESOL Class                     | Moderately soluble | Moderately soluble | Soluble            |
| Ali LogS                       | -5.11              | -6.08              | -3.8               |
| Ali Solubility (mg/ml)         | 2.29E-03           | 2.72E-04           | 4.73E-02           |
| Ali Class                      | Moderately soluble | Poorly soluble     | Soluble            |
| Silicos-IT LogSw               | -6.71              | -6.8               | -5.45              |
| Silicos-IT Solubility (mg/ml)  | 5.76E-05           | 5.13E-05           | 1.05E-03           |
| Silicos-IT class               | Poorly soluble     | Poorly soluble     | Moderately soluble |
| Gastrointestinal absorption    | Moderately         | Moderately         | Moderately         |
| BBB permeant                   | No                 | No                 | No                 |
| Pgp substrate                  | No                 | No                 | No                 |
| Skin permeability logKp (cm/s) | -5.47              | -5.56              | -6.39              |
| Bioavailability Score          | 0.55               | 0.55               | 0.55               |

**Table S21.** Molecular descriptors calculated for compounds in the training and test sets of PS<sub>CuL</sub> database.

| Code   | Ho_Dz(p) | GGI10 | P_VSA_p_2 | Chi1_EA(dm) | DLS_04 | LLS_01 | Selection |
|--------|----------|-------|-----------|-------------|--------|--------|-----------|
| SEN-01 | 59.945   | 0.165 | 65.929    | 15.847      | 0.2    | 0.33   | Training  |
| SEN-02 | 61.251   | 0.231 | 65.929    | 16.917      | 0.2    | 0.33   | Training  |
| SEN-03 | 62.556   | 0.298 | 65.929    | 17.988      | 0.2    | 0.33   | Training  |
| SEN-04 | 28.800   | 0.000 | 70.489    | 16.397      | 1.0    | 0.67   | Training  |
| SEN-05 | 29.380   | 0.016 | 70.489    | 16.397      | 1.0    | 0.67   | Training  |
| SEN-06 | 39.516   | 0.132 | 70.489    | 16.397      | 1.0    | 0.33   | Training  |
| SEN-07 | 34.794   | 0.099 | 71.102    | 21.397      | 1.0    | 0.50   | Training  |
| SEN-08 | 36.382   | 0.116 | 71.102    | 27.76       | 0.8    | 0.50   | Training  |
| SEN-09 | 38.383   | 0.182 | 71.102    | 23.925      | 0.8    | 0.33   | Training  |
| SEN-10 | 38.414   | 0.173 | 71.102    | 27.874      | 0.8    | 0.33   | Training  |
| SEN-11 | 40.640   | 0.173 | 71.102    | 26.257      | 0.6    | 0.33   | Test      |
| SEN-12 | 40.828   | 0.148 | 122.874   | 20.425      | 0.6    | 0.33   | Training  |
| SEN-13 | 29.341   | 0.074 | 100.874   | 10.104      | 1.0    | 0.33   | Test      |
| SEN-14 | 50.010   | 0.124 | 122.874   | 15.773      | 1.0    | 0.17   | Training  |
| SEN-15 | 48.869   | 0.182 | 144.874   | 27.002      | 1.0    | 0.33   | Training  |
| SEN-16 | 52.293   | 0.190 | 115.101   | 24.699      | 1.0    | 0.33   | Training  |
| SEN-17 | 42.684   | 0.223 | 86.662    | 24.932      | 0.6    | 0.17   | Training  |
| SEN-18 | 46.544   | 0.215 | 86.662    | 16.397      | 1.0    | 0.17   | Training  |
| SEN-19 | 44.289   | 0.289 | 86.662    | 26.284      | 0.5    | 0.17   | Training  |
| SEN-20 | 47.461   | 0.313 | 86.662    | 26.257      | 0.6    | 0.17   | Training  |
| SEN-21 | 58.761   | 0.396 | 86.662    | 27.874      | 0.8    | 0.17   | Training  |
| SEN-22 | 60.355   | 0.495 | 86.662    | 29.225      | 0.8    | 0.17   | Test      |



|        |        |       |         |        |     |      |            |
|--------|--------|-------|---------|--------|-----|------|------------|
| SEN-23 | 28.181 | 0.029 | 60.002  | 12.466 | 0.6 | 0.50 | Excluded   |
| SEN-24 | 18.548 | 0.000 | 99.561  | 1.651  | 0.4 | 0.67 | Training   |
| SEN-25 | 15.903 | 0.000 | 62.793  | 2.344  | 0.4 | 1.00 | Prediction |
| SEN-26 | 50.286 | 0.081 | 227.407 | 24.742 | 0.3 | 0.17 | Training   |
| SEN-27 | 55.724 | 0.164 | 238.407 | 27.549 | 0.4 | 0.17 | Test       |
| SEN-28 | 49.099 | 0.081 | 121.855 | 22.035 | 0.6 | 0.17 | Training   |
| SEN-29 | 54.541 | 0.164 | 132.855 | 24.843 | 0.7 | 0.17 | Training   |
| SEN-30 | 45.424 | 0.081 | 187.650 | 21.553 | 0.5 | 0.00 | Training   |
| SEN-31 | 50.876 | 0.131 | 198.650 | 24.361 | 0.5 | 0.00 | Training   |
| SEN-32 | 47.592 | 0.297 | 86.6620 | 16.397 | 1.0 | 0.17 | Test       |
| SEN-33 | 48.509 | 0.354 | 86.662  | 26.257 | 0.5 | 0.17 | Training   |
| SEN-34 | 37.427 | 0.115 | 166.301 | 5.835  | 0.4 | 0.33 | Training   |
| SEN-35 | 40.081 | 0.206 | 219.322 | 10.434 | 0.4 | 0.17 | Training   |
| SEN-36 | 33.719 | 0.050 | 15.325  | 0.000  | 0.2 | 0.50 | Training   |
| SEN-37 | 18.966 | 0.000 | 15.325  | 0.000  | 0.5 | 0.83 | Test       |
| SEN-38 | 27.619 | 0.000 | 33.606  | 0.000  | 0.5 | 0.50 | Test       |
| SEN-39 | 43.175 | 0.066 | 66.605  | 9.103  | 0.7 | 0.17 | Training   |
| SEN-40 | 59.515 | 0.099 | 99.605  | 17.525 | 0.9 | 0.33 | Training   |
| SEN-41 | 49.467 | 0.273 | 76.842  | 11.628 | 0.4 | 0.17 | Training   |
| SEN-42 | 53.874 | 0.380 | 89.881  | 16.982 | 0.9 | 0.17 | Test       |
| SEN-43 | 70.036 | 0.380 | 91.49   | 18.018 | 0.8 | 0.17 | Training   |
| SEN-44 | 72.718 | 0.363 | 91.49   | 18.018 | 0.8 | 0.17 | Training   |
| SEN-45 | 43.545 | 0.248 | 73.21   | 13.954 | 0.5 | 0.17 | Training   |

**Table S22.** Molecular descriptors calculated for compounds in the training and test sets of PS<sub>CdL</sub> database.

| Code   | J_B(s)   | GATS8i | JGI8  | SpMax4_Bh(m) | SpMin3_Bh(s) | SpMin5_Bh(s) | DLS_01 | Selection |
|--------|----------|--------|-------|--------------|--------------|--------------|--------|-----------|
| SEN-01 | 420.2345 | 1.004  | 0.006 | 3.737        | 1.524        | 1.353        | 0.5    | Training  |
| SEN-02 | 439.4922 | 1.002  | 0.008 | 3.737        | 1.524        | 1.356        | 0.5    | Training  |
| SEN-03 | 459.1729 | 1.001  | 0.009 | 3.737        | 1.524        | 1.358        | 0.5    | Training  |
| SEN-04 | 44.5262  | 1.029  | 0.008 | 3.150        | 1.079        | 0.923        | 1.0    | Training  |
| SEN-05 | 33.2807  | 0.970  | 0.007 | 3.334        | 1.122        | 0.853        | 1.0    | Test      |
| SEN-06 | 89.4155  | 0.743  | 0.016 | 3.568        | 1.296        | 1.121        | 1.0    | Training  |
| SEN-07 | 45.7187  | 1.006  | 0.011 | 3.526        | 1.136        | 0.928        | 1.0    | Training  |
| SEN-08 | 41.6672  | 1.061  | 0.009 | 3.534        | 1.105        | 1.034        | 1.0    | Training  |
| SEN-09 | 54.5813  | 1.045  | 0.012 | 3.586        | 1.128        | 1.022        | 1.0    | Training  |
| SEN-10 | 54.5631  | 1.080  | 0.011 | 3.613        | 1.140        | 1.029        | 1.0    | Training  |
| SEN-11 | 52.9249  | 0.995  | 0.011 | 3.599        | 1.101        | 1.011        | 1.0    | Training  |
| SEN-12 | 54.8432  | 0.953  | 0.006 | 3.652        | 1.148        | 1.048        | 1.0    | Training  |
| SEN-13 | 55.9514  | 0.941  | 0.008 | 3.557        | 1.109        | 0.967        | 1.0    | Training  |
| SEN-14 | 140.9681 | 1.009  | 0.006 | 3.676        | 1.287        | 1.172        | 1.0    | Training  |
| SEN-15 | 68.7549  | 0.838  | 0.009 | 3.654        | 1.152        | 1.048        | 1.0    | Training  |
| SEN-16 | 77.8878  | 0.914  | 0.008 | 3.774        | 1.168        | 1.059        | 1.0    | Training  |
| SEN-17 | 57.8869  | 1.051  | 0.008 | 3.852        | 1.181        | 1.034        | 1.0    | Training  |
| SEN-18 | 94.9091  | 1.027  | 0.009 | 3.709        | 1.323        | 1.198        | 1.0    | Training  |
| SEN-19 | 63.9171  | 1.157  | 0.008 | 4.016        | 1.192        | 1.034        | 0.75   | Test      |
| SEN-20 | 62.715   | 0.992  | 0.009 | 3.864        | 1.179        | 1.027        | 1.0    | Training  |

|        |          |       |       |       |       |       |      |          |
|--------|----------|-------|-------|-------|-------|-------|------|----------|
| SEN-21 | 108.3086 | 1.175 | 0.009 | 3.882 | 1.318 | 1.210 | 0.5  | Training |
| SEN-22 | 116.4965 | 1.234 | 0.009 | 4.059 | 1.319 | 1.221 | 0.5  | Training |
| SEN-23 | 33.0552  | 0.934 | 0.007 | 3.500 | 1.041 | 0.414 | 1.0  | Training |
| SEN-24 | 17.1538  | 0.757 | 0.020 | 2.889 | 0.360 | 0.000 | 1.0  | Training |
| SEN-25 | 15.2931  | 0.849 | 0.020 | 2.879 | 0.341 | 0.000 | 1.0  | Training |
| SEN-26 | 55.6744  | 0.944 | 0.009 | 3.852 | 1.033 | 0.483 | 0.75 | Training |
| SEN-27 | 66.0329  | 1.116 | 0.008 | 3.854 | 1.116 | 0.497 | 0.5  | Training |
| SEN-28 | 63.9375  | 0.979 | 0.008 | 3.827 | 1.053 | 0.942 | 0.5  | Training |
| SEN-29 | 74.9841  | 1.104 | 0.007 | 3.836 | 1.054 | 1.007 | 0.25 | Test     |
| SEN-30 | 50.1821  | 0.963 | 0.007 | 3.780 | 0.942 | 0.529 | 0.75 | Training |
| SEN-31 | 60.04    | 1.124 | 0.006 | 3.787 | 1.009 | 0.530 | 0.75 | Test     |
| SEN-32 | 82.2979  | 1.012 | 0.010 | 3.704 | 1.431 | 1.323 | 1.0  | Training |
| SEN-33 | 59.9802  | 0.924 | 0.010 | 3.847 | 1.247 | 1.032 | 0.5  | Training |
| SEN-34 | 45.8078  | 1.029 | 0.005 | 3.594 | 1.072 | 0.449 | 1.0  | Test     |
| SEN-35 | 51.5971  | 0.948 | 0.005 | 3.598 | 1.114 | 0.452 | 1.0  | Training |
| SEN-36 | 170.7217 | 1.019 | 0.005 | 3.737 | 1.524 | 1.258 | 0.75 | Training |
| SEN-37 | 25.6378  | 0.879 | 0.000 | 3.617 | 1.144 | 0.245 | 0.75 | Training |
| SEN-38 | 43.2814  | 1.027 | 0.004 | 3.884 | 1.144 | 0.972 | 0.75 | Training |
| SEN-39 | 69.3908  | 0.908 | 0.005 | 3.884 | 1.147 | 1.144 | 0.75 | Test     |
| SEN-40 | 106.4015 | 0.855 | 0.004 | 3.884 | 1.191 | 1.144 | 0.75 | Test     |
| SEN-41 | 80.8224  | 1.056 | 0.010 | 3.757 | 1.338 | 1.010 | 0.5  | Training |
| SEN-42 | 106.0039 | 1.064 | 0.007 | 3.729 | 1.281 | 1.018 | 0.5  | Training |
| SEN-43 | 172.7874 | 1.027 | 0.006 | 3.884 | 1.520 | 1.452 | 0.5  | Test     |
| SEN-44 | 185.4518 | 1.034 | 0.005 | 3.884 | 1.520 | 1.498 | 0.5  | Training |
| SEN-45 | 69.447   | 1.066 | 0.009 | 3.884 | 1.377 | 1.144 | 0.5  | Training |

**Table S23.** Molecular descriptors calculated for compounds in the training and test sets of PS<sub>PbL</sub> database.

| Code   | MATS6v | MATS2i | GATS4i | GGI8  | JGI8  | SpMin5_Bh(s) | Eta_F_A | Selection |
|--------|--------|--------|--------|-------|-------|--------------|---------|-----------|
| SEN-01 | 0.001  | -0.167 | 1.087  | 0.346 | 0.006 | 1.353        | 0.365   | Training  |
| SEN-02 | 0.011  | -0.169 | 1.074  | 0.444 | 0.008 | 1.356        | 0.367   | Training  |
| SEN-03 | 0.032  | -0.171 | 1.048  | 0.543 | 0.009 | 1.358        | 0.37    | Training  |
| SEN-04 | -0.012 | -0.077 | 1.365  | 0.099 | 0.008 | 0.923        | 0.802   | Training  |
| SEN-05 | -0.155 | -0.108 | 0.976  | 0.107 | 0.007 | 0.853        | 0.728   | Test      |
| SEN-06 | -0.012 | -0.002 | 0.557  | 0.46  | 0.016 | 1.121        | 0.713   | Training  |
| SEN-07 | -0.033 | -0.066 | 1.05   | 0.254 | 0.011 | 0.928        | 0.71    | Training  |
| SEN-08 | 0.033  | -0.117 | 1.096  | 0.288 | 0.009 | 1.034        | 1.051   | Training  |
| SEN-09 | -0.06  | -0.053 | 1.154  | 0.369 | 0.012 | 1.022        | 1.101   | Training  |
| SEN-10 | -0.01  | -0.053 | 1.194  | 0.361 | 0.011 | 1.029        | 1.095   | Training  |
| SEN-11 | -0.027 | -0.166 | 0.995  | 0.361 | 0.011 | 1.011        | 1.157   | Training  |
| SEN-12 | -0.051 | -0.161 | 1.157  | 0.198 | 0.006 | 1.048        | 1.044   | Training  |
| SEN-13 | 0.094  | -0.173 | 1.177  | 0.14  | 0.008 | 0.967        | 0.628   | Training  |
| SEN-14 | 0.016  | -0.192 | 1.071  | 0.189 | 0.006 | 1.172        | 0.624   | Training  |
| SEN-15 | -0.11  | -0.036 | 1.243  | 0.346 | 0.009 | 1.048        | 1.1     | Training  |
| SEN-16 | -0.017 | 0.141  | 1.057  | 0.427 | 0.008 | 1.059        | 1.128   | Training  |
| SEN-17 | -0.051 | -0.176 | 1.179  | 0.304 | 0.008 | 1.034        | 1.208   | Training  |
| SEN-18 | -0.115 | -0.145 | 1.062  | 0.378 | 0.009 | 1.198        | 0.848   | Training  |

|        |        |        |       |       |       |       |       |          |
|--------|--------|--------|-------|-------|-------|-------|-------|----------|
| SEN-19 | 0.039  | -0.137 | 1.176 | 0.395 | 0.008 | 1.034 | 1.097 | Test     |
| SEN-20 | -0.026 | -0.18  | 0.999 | 0.385 | 0.009 | 1.027 | 1.248 | Training |
| SEN-21 | 0.028  | -0.145 | 1.111 | 0.55  | 0.009 | 1.21  | 1.057 | Training |
| SEN-22 | 0.093  | -0.12  | 1.104 | 0.624 | 0.009 | 1.221 | 0.958 | Training |
| SEN-23 | -0.072 | -0.196 | 1.148 | 0.127 | 0.007 | 0.414 | 1.039 | Training |
| SEN-24 | -0.135 | -0.305 | 1.05  | 0.041 | 0.02  | 0     | 0.929 | Training |
| SEN-25 | -0.127 | -0.313 | 1.034 | 0.02  | 0.02  | 0     | 0.908 | Training |
| SEN-26 | 0.103  | 0.086  | 1.119 | 0.345 | 0.009 | 0.483 | 1.149 | Training |
| SEN-27 | 0.104  | 0.073  | 1.16  | 0.278 | 0.008 | 0.497 | 1.119 | Training |
| SEN-28 | 0.028  | -0.225 | 0.982 | 0.369 | 0.008 | 0.942 | 1.046 | Training |
| SEN-29 | 0.037  | -0.208 | 1.022 | 0.303 | 0.007 | 1.007 | 1.023 | Test     |
| SEN-30 | 0.048  | 0.107  | 1.127 | 0.254 | 0.007 | 0.529 | 1.127 | Training |
| SEN-31 | 0.056  | 0.091  | 1.165 | 0.188 | 0.006 | 0.53  | 1.097 | Test     |
| SEN-32 | -0.093 | -0.083 | 1.077 | 0.509 | 0.01  | 1.323 | 0.895 | Training |
| SEN-33 | -0.004 | -0.134 | 1.001 | 0.558 | 0.01  | 1.032 | 1.281 | Training |
| SEN-34 | 0.038  | -0.282 | 1.099 | 0.132 | 0.005 | 0.449 | 1.128 | Test     |
| SEN-35 | 0.092  | -0.188 | 1.206 | 0.181 | 0.005 | 0.452 | 1.178 | Training |
| SEN-36 | 0      | -0.21  | 1.019 | 0.148 | 0.005 | 1.258 | 0.102 | Training |
| SEN-37 | -0.216 | -0.12  | 0.979 | 0     | 0     | 0.245 | 1.025 | Training |
| SEN-38 | -0.025 | -0.128 | 1.073 | 0.129 | 0.004 | 0.972 | 1.196 | Training |
| SEN-39 | -0.146 | -0.003 | 1.218 | 0.156 | 0.005 | 1.144 | 1.097 | Test     |
| SEN-40 | -0.103 | 0.037  | 1.264 | 0.156 | 0.004 | 1.144 | 1.037 | Test     |
| SEN-41 | 0.03   | -0.086 | 1.167 | 0.895 | 0.01  | 1.01  | 1.407 | Training |
| SEN-42 | -0.05  | 0.027  | 1.04  | 0.437 | 0.007 | 1.018 | 1.165 | Training |
| SEN-43 | -0.028 | -0.046 | 1.011 | 0.511 | 0.006 | 1.452 | 1.02  | Test     |
| SEN-44 | -0.016 | -0.055 | 1.01  | 0.462 | 0.005 | 1.498 | 0.984 | Training |
| SEN-45 | -0.013 | 0.046  | 1.157 | 0.401 | 0.009 | 1.144 | 1.212 | Training |

**Table S24.** Molecular descriptors calculated for compounds in the training and test sets of Log $\beta_{\text{CuL}}$  database.

| Code | nHM   | ATSC4e | MATS1v | MATS6p | MATS7p | GATS5p | P_VSA_<br>MR_7 | SM07_<br>AEA(ed) | O-<br>057 | NssCH2 | B06[C-O] | Selection |
|------|-------|--------|--------|--------|--------|--------|----------------|------------------|-----------|--------|----------|-----------|
| L1   | 0.500 | 0.143  | 0.485  | 0.292  | 0.140  | 0.651  | 0.000          | 0.547            | 0.000     | 0.000  | 1.000    | Training  |
| L2   | 0.500 | 0.112  | 0.338  | 0.060  | 0.082  | 0.496  | 0.199          | 0.519            | 0.000     | 0.000  | 0.000    | Training  |
| L3   | 0.500 | 0.119  | 0.447  | 0.413  | 0.247  | 0.506  | 0.000          | 0.666            | 0.000     | 0.000  | 1.000    | Training  |
| L4   | 0.500 | 0.126  | 0.620  | 0.498  | 0.428  | 0.689  | 0.000          | 0.694            | 0.000     | 0.000  | 0.000    | Training  |
| L5   | 0.500 | 0.065  | 0.928  | 0.111  | 0.264  | 0.512  | 0.241          | 0.553            | 0.000     | 0.063  | 0.000    | Training  |
| L6   | 0.500 | 0.078  | 0.932  | 0.600  | 0.407  | 0.800  | 0.070          | 0.711            | 0.250     | 0.000  | 1.000    | Test      |
| L7   | 0.500 | 0.047  | 0.616  | 0.592  | 0.329  | 0.759  | 0.195          | 0.481            | 0.000     | 0.000  | 0.000    | Test      |
| L8   | 0.500 | 0.047  | 0.359  | 0.745  | 0.035  | 0.728  | 0.070          | 0.604            | 0.000     | 0.000  | 0.000    | Training  |
| L10  | 0.500 | 0.101  | 0.895  | 0.766  | 0.193  | 0.645  | 0.070          | 0.549            | 0.250     | 0.000  | 1.000    | Training  |
| L11  | 0.500 | 0.078  | 0.895  | 0.663  | 0.208  | 0.680  | 0.070          | 0.553            | 0.250     | 0.000  | 0.000    | Training  |
| L12  | 0.500 | 0.029  | 0.709  | 0.734  | 0.156  | 0.710  | 0.070          | 0.481            | 0.000     | 0.000  | 0.000    | Training  |
| L13  | 0.500 | 0.045  | 0.540  | 0.767  | 0.348  | 0.895  | 0.195          | 0.521            | 0.000     | 0.000  | 0.000    | Training  |
| L14  | 0.500 | 0.065  | 0.540  | 0.144  | 0.531  | 0.707  | 0.120          | 0.547            | 0.000     | 0.000  | 0.000    | Test      |
| L15  | 0.500 | 0.059  | 0.540  | 0.136  | 0.328  | 0.556  | 0.125          | 0.547            | 0.000     | 0.000  | 0.000    | Training  |
| L16  | 0.500 | 0.097  | 0.886  | 0.386  | 0.388  | 0.812  | 0.195          | 0.651            | 0.250     | 0.000  | 0.000    | Training  |

|     |       |       |       |       |       |       |       |       |       |       |       |          |
|-----|-------|-------|-------|-------|-------|-------|-------|-------|-------|-------|-------|----------|
| L17 | 0.500 | 0.089 | 0.570 | 0.441 | 0.335 | 1.000 | 0.195 | 0.656 | 0.250 | 0.063 | 0.000 | Training |
| L18 | 0.500 | 0.091 | 0.675 | 0.361 | 0.348 | 0.944 | 0.195 | 0.673 | 0.250 | 0.000 | 0.000 | Training |
| L19 | 0.500 | 0.202 | 0.481 | 0.380 | 0.291 | 0.671 | 0.070 | 0.729 | 0.250 | 0.000 | 1.000 | Training |
| L21 | 0.500 | 0.092 | 0.793 | 0.379 | 0.400 | 0.630 | 0.000 | 0.679 | 0.250 | 0.000 | 1.000 | Training |
| L22 | 0.500 | 0.073 | 0.262 | 0.189 | 0.286 | 0.605 | 0.120 | 0.554 | 0.000 | 0.000 | 0.000 | Training |
| L23 | 0.500 | 0.269 | 0.658 | 0.601 | 0.196 | 0.783 | 0.070 | 0.771 | 0.500 | 0.250 | 1.000 | Training |
| L24 | 0.500 | 0.144 | 0.658 | 0.549 | 0.345 | 0.669 | 0.070 | 0.715 | 0.250 | 0.000 | 1.000 | Training |
| L26 | 0.500 | 0.112 | 0.203 | 0.390 | 0.219 | 0.464 | 0.245 | 0.634 | 0.000 | 0.000 | 0.000 | Test     |
| L27 | 0.500 | 0.105 | 0.570 | 0.000 | 0.285 | 0.577 | 0.199 | 0.511 | 0.000 | 0.000 | 0.000 | Training |
| L28 | 0.000 | 0.192 | 0.637 | 0.418 | 0.383 | 0.694 | 0.000 | 0.602 | 0.000 | 0.625 | 0.000 | Training |
| L29 | 0.000 | 0.212 | 0.624 | 0.323 | 0.302 | 0.697 | 0.000 | 0.602 | 0.000 | 0.688 | 1.000 | Test     |
| L30 | 0.000 | 0.211 | 0.574 | 0.431 | 0.314 | 0.700 | 0.000 | 0.602 | 0.000 | 0.750 | 0.000 | Training |
| L31 | 0.500 | 0.653 | 0.312 | 0.614 | 0.218 | 0.767 | 0.000 | 0.713 | 1.000 | 0.563 | 0.000 | Training |
| L32 | 0.500 | 0.553 | 0.443 | 0.550 | 0.223 | 0.770 | 0.022 | 0.763 | 1.000 | 0.563 | 0.000 | Training |
| L33 | 0.500 | 0.172 | 0.253 | 0.767 | 0.285 | 0.110 | 0.012 | 0.836 | 0.000 | 0.000 | 0.000 | Training |
| L34 | 0.500 | 0.223 | 0.667 | 0.802 | 0.285 | 0.118 | 0.000 | 0.836 | 0.000 | 0.063 | 0.000 | Training |
| L35 | 0.500 | 0.251 | 0.266 | 0.078 | 0.376 | 0.799 | 0.000 | 0.558 | 0.000 | 0.188 | 1.000 | Training |
| L36 | 0.500 | 0.390 | 0.430 | 0.169 | 0.464 | 0.716 | 0.375 | 0.748 | 0.000 | 0.250 | 1.000 | Training |
| L37 | 0.000 | 0.060 | 0.371 | 0.376 | 0.236 | 0.835 | 0.736 | 0.721 | 0.000 | 0.000 | 0.000 | Training |
| L38 | 0.000 | 0.141 | 0.599 | 0.328 | 0.241 | 0.690 | 1.000 | 0.762 | 0.000 | 0.000 | 0.000 | Training |
| L39 | 0.000 | 0.195 | 0.595 | 0.432 | 0.289 | 0.705 | 0.741 | 0.973 | 0.000 | 0.125 | 0.000 | Training |
| L40 | 0.000 | 0.036 | 0.451 | 0.220 | 0.187 | 0.671 | 0.125 | 0.585 | 0.000 | 0.000 | 0.000 | Training |
| L41 | 0.000 | 0.287 | 0.350 | 0.574 | 0.277 | 0.868 | 0.198 | 0.697 | 0.000 | 0.188 | 1.000 | Test     |
| L42 | 0.000 | 0.256 | 0.637 | 0.295 | 0.330 | 0.878 | 0.120 | 0.575 | 0.250 | 0.125 | 1.000 | Training |
| L43 | 0.000 | 0.326 | 0.582 | 0.351 | 0.253 | 0.889 | 0.120 | 0.595 | 0.250 | 0.188 | 1.000 | Training |
| L44 | 0.000 | 0.252 | 0.637 | 0.310 | 0.406 | 0.859 | 0.120 | 0.567 | 0.250 | 0.125 | 1.000 | Training |
| L45 | 1.000 | 0.091 | 0.295 | 0.058 | 0.398 | 0.668 | 0.230 | 0.581 | 0.000 | 0.500 | 0.000 | Training |
| L46 | 0.500 | 0.136 | 0.312 | 0.328 | 0.247 | 0.747 | 0.125 | 0.510 | 0.000 | 0.688 | 0.000 | Test     |
| L47 | 1.000 | 0.148 | 0.338 | 0.277 | 0.240 | 0.719 | 0.250 | 0.581 | 0.000 | 0.750 | 0.000 | Training |
| L48 | 0.000 | 0.459 | 0.675 | 0.891 | 0.285 | 0.009 | 0.000 | 0.713 | 0.000 | 0.188 | 0.000 | Training |
| L50 | 0.000 | 0.630 | 0.662 | 0.163 | 0.276 | 0.838 | 0.258 | 0.842 | 0.750 | 0.125 | 1.000 | Training |
| L51 | 0.000 | 1.000 | 0.430 | 0.351 | 0.286 | 0.790 | 0.220 | 1.000 | 0.000 | 1.000 | 1.000 | Training |
| L52 | 0.000 | 0.768 | 0.511 | 0.391 | 0.280 | 0.771 | 0.220 | 1.000 | 0.000 | 0.750 | 1.000 | Test     |
| L53 | 0.000 | 0.071 | 0.519 | 0.389 | 0.285 | 0.000 | 0.000 | 0.458 | 0.250 | 0.063 | 0.000 | Training |
| L54 | 0.000 | 0.182 | 0.422 | 0.452 | 0.525 | 0.719 | 0.000 | 0.489 | 0.500 | 0.125 | 0.000 | Training |
| L55 | 0.000 | 0.335 | 0.329 | 0.493 | 0.551 | 0.796 | 0.000 | 0.556 | 0.750 | 0.188 | 0.000 | Training |
| L56 | 0.000 | 0.090 | 0.270 | 0.393 | 0.477 | 0.806 | 0.000 | 0.467 | 0.250 | 0.188 | 0.000 | Test     |
| L57 | 0.000 | 0.460 | 0.207 | 0.507 | 0.234 | 0.700 | 0.000 | 0.596 | 1.000 | 0.375 | 0.000 | Training |
| L58 | 0.000 | 0.017 | 0.063 | 0.389 | 0.285 | 0.000 | 0.000 | 0.000 | 0.000 | 0.125 | 0.000 | Training |
| L59 | 0.000 | 0.075 | 0.152 | 0.471 | 0.266 | 0.802 | 0.000 | 0.058 | 0.000 | 0.500 | 0.000 | Training |
| L60 | 0.000 | 0.286 | 0.954 | 0.900 | 0.678 | 0.305 | 0.000 | 0.606 | 0.500 | 0.063 | 0.000 | Training |
| L61 | 0.000 | 0.116 | 0.835 | 0.222 | 0.315 | 0.840 | 0.000 | 0.618 | 0.250 | 0.063 | 1.000 | Training |
| L62 | 0.000 | 0.142 | 0.962 | 0.260 | 0.236 | 0.894 | 0.000 | 0.688 | 0.250 | 0.063 | 1.000 | Test     |
| L63 | 0.000 | 0.288 | 0.785 | 0.497 | 0.572 | 0.600 | 0.000 | 0.604 | 0.500 | 0.125 | 0.000 | Training |
| L64 | 0.000 | 0.245 | 1.000 | 0.865 | 0.688 | 0.460 | 0.000 | 0.606 | 0.250 | 0.063 | 0.000 | Test     |
| L65 | 0.000 | 0.132 | 0.384 | 0.741 | 0.631 | 0.866 | 0.000 | 0.606 | 0.250 | 0.063 | 0.000 | Training |

|     |       |       |       |       |       |       |       |       |       |       |       |          |
|-----|-------|-------|-------|-------|-------|-------|-------|-------|-------|-------|-------|----------|
| L66 | 0.000 | 0.072 | 0.700 | 1.000 | 1.000 | 0.563 | 0.000 | 0.521 | 0.250 | 0.000 | 0.000 | Test     |
| L67 | 0.000 | 0.086 | 0.367 | 0.271 | 0.212 | 0.728 | 0.000 | 0.664 | 0.250 | 0.438 | 0.000 | Training |
| L68 | 0.000 | 0.085 | 0.249 | 0.319 | 0.000 | 0.783 | 0.000 | 0.745 | 0.000 | 0.000 | 1.000 | Test     |
| L69 | 0.000 | 0.131 | 0.295 | 0.402 | 0.185 | 0.699 | 0.000 | 0.750 | 0.000 | 0.375 | 1.000 | Training |
| L70 | 0.000 | 0.000 | 0.000 | 0.389 | 0.285 | 0.000 | 0.125 | 0.270 | 0.000 | 0.000 | 0.000 | Training |
| L71 | 0.000 | 0.193 | 0.371 | 0.315 | 0.292 | 0.683 | 0.000 | 0.489 | 0.000 | 0.375 | 1.000 | Training |
| L72 | 0.000 | 0.139 | 0.574 | 0.544 | 0.211 | 0.678 | 0.134 | 0.724 | 0.250 | 0.000 | 1.000 | Training |
| L74 | 0.000 | 0.181 | 0.481 | 0.461 | 0.350 | 0.712 | 0.134 | 0.690 | 0.250 | 0.000 | 1.000 | Test     |
| L75 | 0.000 | 0.165 | 0.477 | 0.431 | 0.283 | 0.771 | 0.134 | 0.668 | 0.250 | 0.063 | 1.000 | Training |
| L76 | 0.000 | 0.205 | 0.481 | 0.557 | 0.215 | 0.712 | 0.134 | 0.736 | 0.250 | 0.000 | 1.000 | Training |

**Table S25.** Molecular descriptors calculated for compounds in the training and test sets of Log $\beta_{\text{CDL}}$  database.

| Code | RBN | SPI    | H_D/Dt   | MATS1m | MATS2m | MATS6i | Selection |
|------|-----|--------|----------|--------|--------|--------|-----------|
| L77  | 0   | 0      | 274.8    | 0.084  | -0.247 | 0.042  | Training  |
| L78  | 0   | 0      | 274.8    | 0.096  | -0.272 | 0.004  | Training  |
| L79  | 0   | 0      | 274.8    | 0.093  | -0.301 | -0.155 | Training  |
| L80  | 3   | 4.973  | 386.04   | 0.092  | -0.224 | -0.03  | Training  |
| L81  | 3   | 4.973  | 386.04   | 0.095  | -0.243 | -0.126 | Test      |
| L82  | 6   | 8.344  | 513.279  | 0.068  | -0.183 | -0.015 | Training  |
| L83  | 0   | 0      | 1518.073 | 0.058  | -0.061 | 0.112  | Training  |
| L84  | 2   | 6.869  | 1726.326 | 0.055  | -0.045 | 0.175  | Training  |
| L85  | 0   | 0      | 497.595  | 0.085  | -0.26  | -0.095 | Training  |
| L86  | 3   | 5.633  | 644.129  | 0.086  | -0.201 | -0.089 | Test      |
| L87  | 0   | 0      | 274.8    | 0.075  | -0.243 | 0.024  | Training  |
| L88  | 6   | 0      | 794.85   | 0.084  | -0.077 | 0.005  | Training  |
| L89  | 6   | 0      | 827.052  | 0.084  | -0.077 | 0.18   | Training  |
| L90  | 1   | 0      | 167.067  | 0.053  | -0.152 | -0.026 | Training  |
| L91  | 2   | 10.096 | 296.789  | -0.019 | 0      | 0.17   | Test      |
| L92  | 4   | 20.193 | 556.289  | -0.028 | 0.302  | 0.194  | Training  |
| L93  | 2   | 8.426  | 271.178  | -0.023 | 0.045  | 0.309  | Test      |
| L94  | 2   | 8.426  | 271.178  | -0.012 | -0.001 | 0.175  | Training  |
| L95  | 4   | 18.621 | 515.631  | -0.014 | 0.287  | 0.177  | Training  |
| L53  | 1   | 2.804  | 10       | -0.183 | 0.055  | 0      | Training  |
| L96  | 2   | 5.586  | 28       | -0.111 | 0.14   | 0.273  | Test      |
| L65  | 3   | 6.386  | 36       | -0.099 | 0.088  | 0.216  | Test      |
| L97  | 3   | 6.28   | 36       | -0.099 | 0.088  | 0.237  | Training  |
| L98  | 3   | 5.197  | 28       | -0.111 | 0.036  | 0.201  | Training  |
| L99  | 4   | 5.865  | 36       | -0.099 | -0.001 | -0.036 | Training  |
| L61  | 3   | 6.317  | 115.133  | -0.059 | -0.053 | -0.145 | Training  |
| L62  | 3   | 7.542  | 268.96   | -0.037 | -0.009 | -0.056 | Test      |
| L100 | 6   | 8.542  | 66       | -0.112 | 0.005  | -0.025 | Training  |
| L60  | 3   | 6.386  | 36       | -0.155 | 0.096  | 0.242  | Training  |
| L101 | 4   | 7.139  | 45       | -0.125 | 0.07   | 0.168  | Training  |
| L102 | 2   | 4.504  | 21       | -0.172 | -0.042 | 0.176  | Training  |
| L103 | 2   | 5.586  | 28       | -0.144 | 0.09   | 0.22   | Training  |
| L104 | 3   | 7.901  | 132.467  | -0.087 | -0.002 | -0.185 | Training  |

|      |   |       |        |        |        |        |          |
|------|---|-------|--------|--------|--------|--------|----------|
| L60  | 3 | 6.386 | 36     | -0.155 | 0.096  | 0.242  | Training |
| L42  | 3 | 5.85  | 85.533 | -0.065 | -0.018 | 0.027  | Training |
| L105 | 4 | 5.865 | 36     | 0.015  | -0.242 | -0.173 | Training |
| L106 | 2 | 4.504 | 21     | -0.216 | -0.16  | 0.284  | Training |
| L107 | 3 | 6.386 | 36     | -0.243 | -0.04  | 0.485  | Training |
| L108 | 4 | 5.865 | 36     | -0.125 | -0.047 | 0.163  | Test     |
| L109 | 2 | 2.79  | 53.567 | -0.019 | -0.111 | 0.156  | Training |

**Table S26.** Molecular descriptors calculated for compounds in the training and test sets of Log $\beta_{\text{pBL}}$  database.

| Code | nR05 | J_Dt   | ATSC1s | GATS8m | SM03_EA(bo) | Selection |
|------|------|--------|--------|--------|-------------|-----------|
| L110 | 0    | 0.8391 | 11.339 | 1.59   | 4.477       | Training  |
| L111 | 2    | 0.589  | 6.94   | 1.195  | 4.698       | Training  |
| L112 | 0    | 0.4013 | 3.972  | 0.823  | 4.321       | Training  |
| L113 | 0    | 4.156  | 40.64  | 1.304  | 3.892       | Training  |
| L114 | 0    | 1.0879 | 20.917 | 0.27   | 4.111       | Test      |
| L115 | 2    | 1.0881 | 4.336  | 1.163  | 3.951       | Test      |
| L116 | 1    | 0.9681 | 6.736  | 0.942  | 4.677       | Training  |
| L117 | 0    | 1.0123 | 18.826 | 0.479  | 3.761       | Training  |
| L118 | 1    | 1.039  | 6.531  | 0.972  | 3.98        | Test      |
| L119 | 1    | 1.0501 | 6.805  | 1.05   | 4.301       | Training  |
| L120 | 0    | 1.3229 | 14.651 | 0      | 3.761       | Training  |
| L121 | 2    | 1.0323 | 5.054  | 0.532  | 3.332       | Training  |
| L122 | 0    | 1.2488 | 6.74   | 0      | 3.892       | Training  |
| L123 | 0    | 0.834  | 16.453 | 1.285  | 5.278       | Training  |
| L124 | 0    | 1.0575 | 11.191 | 1.087  | 4.27        | Test      |
| L125 | 2    | 1.1976 | 8.328  | 1.358  | 3.951       | Training  |
| L126 | 0    | 1.1272 | 10.289 | 0.681  | 4.551       | Training  |
| L127 | 0    | 0.4182 | 24.136 | 1.036  | 6.048       | Training  |
| L128 | 2    | 0.6673 | 2.799  | 1.212  | 4.227       | Training  |
| L129 | 2    | 0.3151 | 2.778  | 1.317  | 5.056       | Test      |
| L130 | 1    | 1.0532 | 4.055  | 1.035  | 3.951       | Training  |
| L131 | 2    | 1.2558 | 20.217 | 1.11   | 4.635       | Training  |
| L132 | 0    | 1.1163 | 7.505  | 0.693  | 4.159       | Training  |
| L133 | 0    | 1.0585 | 6.621  | 1.305  | 4.62        | Training  |
| L134 | 0    | 0.5882 | 7.364  | 1.152  | 5.231       | Training  |
| L135 | 0    | 1.5163 | 13.546 | 1.522  | 4.477       | Training  |
| L136 | 0    | 0.9409 | 12.036 | 0.977  | 2.565       | Training  |
| L137 | 0    | 1.2752 | 68.513 | 0.392  | 5.112       | Training  |
| L138 | 0    | 0.8093 | 21.01  | 0.96   | 5.308       | Training  |
| L139 | 2    | 0.6997 | 5.296  | 1.168  | 4.407       | Training  |
| L140 | 2    | 0.5563 | 6.386  | 1.018  | 4.718       | Test      |
| L6   | 0    | 0.8135 | 11.613 | 1.98   | 4.469       | Training  |
| L141 | 1    | 0.853  | 8.56   | 2.788  | 4.259       | Training  |
| L142 | 0    | 1.4722 | 12.277 | 1.689  | 4.099       | Test      |
| L143 | 0    | 1.5138 | 11.583 | 2.266  | 4.073       | Training  |
